1       **Does Sex Modify an Association of Electrophysiological Substrate with Sudden Cardiac**  
2                               **Death? The Atherosclerosis Risk in Communities (ARIC) Study**

3       Stacey J. Howell, MD<sup>1</sup>, David German, MD<sup>1</sup>, Aron Bender, MD<sup>1</sup>, Francis Phan, MD<sup>1</sup>, Srini  
4       V. Mukundan, MD<sup>1,2</sup>, Erick A. Perez-Alday, PhD<sup>1</sup>, Nichole M. Rogovoy, BS<sup>1</sup>, Kazi Haq, PhD<sup>1</sup>,  
5       Katherine Yang, BS<sup>1,3</sup>, Ashley Wirth, BS,<sup>1</sup> Kelly Jensen, MD<sup>1</sup>, Larisa G. Tereshchenko, MD,  
6       PhD<sup>1,4</sup>.

7       <sup>1</sup>Knight Cardiovascular Institute, Oregon Health & Science University, Portland, OR; <sup>2</sup>Rush  
8       University Medical Center, Chicago, IL; <sup>3</sup>Sidney Kimmel Medical College, Philadelphia, PA;  
9       <sup>4</sup>Cardiovascular Division, Department of Medicine, Johns Hopkins School of Medicine,  
10      Baltimore, MD.

11  
12      Correspondence: Larisa Tereshchenko, 3181 SW Sam Jackson Park Rd; UHN62; Portland,  
13      OR, 97239. E-mail:tereshch@ohsu.edu. Phone:503-494-7400; Fax:503-494-8550.

14  
15      **Brief title: Sex modifies EP substrate – SCD association**

16      Subject Codes: Electrocardiology; Epidemiology, women

17

18

19      ARIC Manuscript #3293 approved by ARIC P&P on June 14, 2019

20

21      Words: 4987

22

1  
2  
3  
4  
5  
6  
7  
8  
9  
10  
11  
12  
13  
14  
15  
16  
17  
18  
19  
20  
21  
22  
23

## Abstract

**Background**—Sex is a well-recognized risk factor for sudden cardiac death (SCD). Sex differences in electrophysiological (EP) substrate of SCD are known. However, it remains unknown whether sex can modify an association of EP substrate with SCD.

**Methods**—Participants from the Atherosclerosis Risk in Communities study with analyzable ECGs (n=14,725; age, 54.2±5.8 yrs; 55% female, 74% white) were included. EP substrate was characterized by traditional 12-lead ECG (heart rate, QRS, QTc, Cornell voltage), spatial ventricular gradient (SVG) and sum absolute QRST integral (SAI QRST) metrics. Two competing outcomes were adjudicated SCD and nonSCD. Interaction of ECG metrics with sex was studied in Cox proportional hazards and Fine-Gray competing risk models. Relative hazard ratio (RHR) and relative sub-hazard ratio (RSHR) with a 95% confidence interval for SCD and nonSCD risk for women relative to men were calculated. Model 1 was adjusted for prevalent cardiovascular disease (CVD) and risk factors. Time-updated model 2 was additionally adjusted for incident non-fatal CVD.

**Results**—Over a median follow-up of 24.4 years, there were 530 SCDs (incidence 1.72 (1.58-1.88)/1000 person-years) and 2,178 nonSCDs (incidence 7.09; (6.80-7.39)/ 1000 person-years). Women experienced a greater than men risk of SCD associated with Cornell voltage (RHR 1.18(1.06-1.32); P=0.003), SAI QRST (RHR 1.16(1.04-1.30); P=0.007), area SVG magnitude (RHR 1.24(1.05-1.45); P=0.009), and peak SVG magnitude (RHR 1.22(1.04-1.44); P=0.018), independently from incident CVD. Greater risk of SCD for women than men associated with QRS duration (RHR 1.24(1.07-1.44); P=0.004) and QTc (RSHR 1.15(1.02-1.30); P=0.025) was explained by incident CVD. Furthermore, women had greater odds of SCD associated with heart rate (RSHR 1.19(1.01-1.40); P=0.036), independently of incident CVD.

1 **Conclusions**—Sex modifies an association of EP substrate with SCD. In women, global EP  
2 substrate is associated with up to 27% greater risk of SCD than in men. Development of sex-  
3 specific risk scores of SCD is necessary. Further studies of mechanisms behind sex differences in  
4 EP substrate of SCD are warranted.

5 **Keywords:** sudden cardiac death, women, sex, ECG, global electrical heterogeneity, SAI  
6 QRST, spatial ventricular gradient, QRS-T angle, competing risk

7

1  
2  
3  
4  
5  
6  
7  
8  
9  
10  
11  
12  
13  
14  
15  
16  
17  
18  
19  
20  
21  
22  
23

## Introduction

Sudden cardiac death (SCD) is a leading cause of death in the United States. Sex is a well-recognized risk factor for SCD.<sup>1</sup> SCD more commonly occurs in men as compared to women. Women have a lower prevalence of obstructive coronary heart disease (CHD) and systolic dysfunction preceding SCD.<sup>2</sup> Women are also less likely than men to receive implantable cardioverter defibrillators (ICD) for primary and secondary prevention of SCD.<sup>3</sup> Women were underrepresented in ICD trials, and, in result, randomized controlled trials (RCTs) did not have sufficient statistical power to detect a significant survival benefit of ICD therapy in women.<sup>4</sup> Moreover, regardless of underlying etiology of heart disease,<sup>5</sup> women with ICDs are less likely to experience ventricular tachyarrhythmias,<sup>5</sup> and receive appropriate ICD therapies,<sup>6</sup> and are more likely to suffer device-related complications.<sup>7</sup> Therefore, SCD risk stratification is especially important for women.

Risk stratification of SCD for both sexes is inadequate and current practice relies on the degree of left ventricular (LV) dysfunction.<sup>8</sup> While sex differences in cardiac electrophysiology have been recognized,<sup>9</sup> sex is not routinely considered a potential effect modifier of the association between electrophysiological (EP) substrate and SCD. As women develop CHD approximately 10 years later than men, women are commonly viewed as “younger men”.

Widely available routine surface 12-lead electrocardiogram (ECG) describes global characteristics of the EP substrate of SCD.<sup>10</sup> Sex differences in EP substrate are known: women have faster heart rate, narrower QRS and longer QT interval than men.<sup>9</sup> However, it remains unknown whether sex can modify an association of EP substrate with SCD. Recently, we expanded the armamentarium for global ECG measures of EP substrate by adding global electrical heterogeneity (GEH).<sup>1</sup> GEH is quantified by spatial ventricular gradient (SVG)

1 magnitude and direction (elevation and azimuth), its scalar value sum absolute QRST integral  
2 (SAI QRST), and spatial QRS-T angle. The addition of GEH to demographic (age, sex, race) and  
3 clinical (diabetes, hypertension, CHD, stroke) risk factors improves reclassification of SCD<sup>1</sup>.  
4 However, it remains unknown whether GEH as a measure of independent EP substrate is  
5 different in men and women, and whether sex can modify the association of GEH and traditional  
6 global ECG measures with SCD. We hypothesized that (1) there are sex differences in GEH, and  
7 (2) sex modifies the association of traditional and novel global ECG measures of EP substrate  
8 with SCD.

## 9 **Methods**

### 10 *Study population*

11 The Atherosclerosis Risk in Communities (ARIC) study is a prospective cohort that recruited  
12 15,792 men and women, age 45-64 years, selected as a probability sample from four United  
13 States communities. Participants were recruited in 1987-1989. Standardized examinations were  
14 conducted as previously described.<sup>11</sup> Included in the analysis were ARIC cohort participants with  
15 recorded resting 12-lead ECG and measured global electrical heterogeneity (GEH); n=15,777.  
16 Excluded were participants self-identifying as non-white or non-black race (n=48), or as black at  
17 the Washington County, and Minneapolis field centers (n=55), those with missing covariates  
18 (n=903), and non-sinus median beat (n=46). The final sample of participants with normal sinus  
19 median beat included 14,725 participants.

### 20 *Exposures of sex and electrocardiographic global electrical heterogeneity*

21 Resting 12-lead ECGs of the first five study visits were analyzed. Visit 1 was conducted in  
22 1987-1989, visit 2 in 1990-1992, visit 3 in 1993-1995, visit 4 in 1996-1998, and visit 5 in 2011-

1 2013. Traditional ECG amplitudes and intervals were measured by the 12 SL algorithm (GE  
2 Marquette Electronics, Milwaukee, WI). Sex-specific Cornell product was calculated to define  
3 ECG-left ventricular hypertrophy (LVH).

4 GEH was measured as previously described,<sup>12</sup> by spatial QRS-T angle, SVG magnitude,  
5 azimuth, and elevation, and SAI QRST. The MATLAB (MathWorks, Natick, MA, USA)  
6 software code for GEH measurement is provided at <https://physionet.org/physiotools/geh>. Both  
7 area and peak SVG vectors<sup>12</sup> and QRS-T angles were included in analysis. Previously reported<sup>1</sup>  
8 area-based GEH metrics were used in this study. To measure peak-vector-based GEH metrics,  
9 we constructed a time-coherent median beat and defined isoelectric heart vector origin point, as  
10 described.<sup>13</sup> The MATLAB (MathWorks, Natick, MA, USA) software code for the heart vector  
11 origin definition is provided at <https://github.com/Tereshchenkolab/Origin>. In this study, we  
12 included only participants with a normal sinus median beat.

### 13 ***Primary outcome: sudden cardiac death***

14 Follow-up of ARIC participants<sup>14</sup> and adjudication of SCD was previously described.<sup>15</sup>  
15 Physician-adjudicated SCD was defined as a sudden pulseless condition in a previously stable  
16 individual without evidence of a non-cardiac cause of cardiac arrest if the cardiac arrest occurred  
17 out of the hospital or in the emergency room. Definite, probable, or possible SCD was included  
18 in this study as a primary outcome.

### 19 ***Competing mortality outcome: non-sudden cardiac death***

20 Non-sudden cardiac death (nonSCD) was defined as a composite of fatal CHD, heart failure  
21 (HF) death, death in a participant with baseline HF, or incident hospitalized HF. Cases of fatal  
22 CHD were adjudicated by the ARIC Morbidity and Mortality Classification Committee.<sup>14, 16</sup>  
23 Baseline prevalent HF was defined as a symptomatic HF (stage 3 by the Gothenburg criteria,

1 requiring manifestation of HF cardiac and pulmonary symptoms in addition to medical  
2 treatment<sup>17</sup>), or self-reported use of HF medication. Incident HF was defined based on the HF  
3 codes in a death certificate or an International Classification of Diseases (*ICD-9*) discharge code,  
4 in any position, as previously described.<sup>18</sup> All other deaths comprised the noncardiac death  
5 outcome.

## 6 ***Baseline clinical characteristics***

7 Body mass index (BMI) was categorized as underweight (<18.5 kg/m<sup>2</sup>), normal weight (18.5  
8 to <25.0 kg/m<sup>2</sup>), overweight (25.0 to <30.0 kg/m<sup>2</sup>) or obese (≥30.0 kg/m<sup>2</sup>). Hypertension was  
9 defined as blood pressure (BP) of ≥140/90 mm Hg, or report of taking antihypertensive  
10 medication at visit 1. Diabetes was defined as nonfasting blood glucose ≥200 mg/dL, fasting  
11 blood glucose ≥126 mg/dL, self-reported physician diagnosis of diabetes, or reporting taking  
12 medication for diabetes or high blood sugar at visit 1. Stages of chronic kidney disease (CKD)  
13 were based on estimated glomerular filtration rate (eGFR) calculated using the CKD  
14 Epidemiology Collaboration equation (CKD-EPI).<sup>19</sup> Stage 1 CKD included participants with  
15 normal or increased kidney function (eGFR<sub>CKD-EPI</sub> ≥90 mL/min/1.73 m<sup>2</sup>). Stage 2 CKD included  
16 mild decreased kidney function (eGFR<sub>CKD-EPI</sub> 60 to <90 mL/min/1.73 m<sup>2</sup>). Stage 3 CKD included  
17 moderate decreased kidney function (eGFR<sub>CKD-EPI</sub> 30 to <60 mL/min/1.73 m<sup>2</sup>). Stage 4 CKD  
18 participants had severe decreased kidney function (eGFR<sub>CKD-EPI</sub> 15 to <30 mL/min/1.73 m<sup>2</sup>), and  
19 stage 5 CKD was established kidney failure (eGFR<sub>CKD-EPI</sub> <15 mL/min/1.73 m<sup>2</sup>). Physical  
20 activity during leisure time was assessed using the Baecke questionnaire.<sup>20</sup> Postmenopausal  
21 status was determined by questionnaire<sup>21</sup> and was defined as either surgical or natural  
22 postmenopause, or primary amenorrhea. Prevalent stroke was diagnosed by a stroke and transient  
23 ischemic attack diagnostic algorithm, as previously reported<sup>22</sup>. Prevalent CHD was defined as a

1 self-reported physician diagnosis of myocardial infarction (MI), or baseline ECG evidence of MI  
2 by the Minnesota code, a history of angina pectoris, or a history of coronary revascularization  
3 (either via coronary artery bypass surgery or percutaneous coronary intervention). Use of  
4 antiarrhythmic drugs included self-reported and validated by medications inventory use of class  
5 I, II (beta-blockers), III, IV (phenylalkylamines and benzothiazepines calcium channel blockers),  
6 or V (digoxin) antiarrhythmic agents.

### 7 *Incident non-fatal cardiovascular events*

8 Incident atrial fibrillation (AF) was defined as either detected on follow-up 12-lead ECG or  
9 hospital discharge records (*ICD-9* code 427.3).<sup>23</sup> Incident stroke was physician-adjudicated, as  
10 previously described.<sup>24</sup> Definite or probable incident strokes are included in this study. Expert-  
11 adjudicated incident CHD was defined as a definite or probable MI, angina, or a coronary  
12 revascularization procedure.<sup>14, 16</sup> Incident HF was defined above.<sup>18</sup>

### 13 *Statistical analyses*

#### 14 *Cross-sectional analyses at the baseline*

15 Normally distributed continuous variables were compared using a *t*-test and presented as  
16 means  $\pm$  standard deviation (SD). Chi-square test was used to compare categorical variables.

17 To determine differences in GEH between men and women, we constructed two linear  
18 regression models with sex as a predictor and normally distributed GEH variables (one-by-one)  
19 as an outcome. Model 1 was adjusted for age and combinations of race and study center. To  
20 determine whether sex differences in GEH can be explained by sex differences in clinical and  
21 traditional ECG characteristics, Model 2 was additionally adjusted for prevalent cardiovascular  
22 (CV) disease (HF, CHD, stroke), known CV risk factors (diabetes, hypertension, postmenopausal  
23 state in women, current smoking and alcohol intake, leisure physical activity level, levels of total



1 cholesterol, high density lipoprotein (HDL), and triglycerides, BMI), use of antihypertensive and  
2 antiarrhythmic medications, serum concentrations of sodium, potassium, calcium, magnesium,  
3 phosphorus, and uric acid, total protein and albumin, blood urea nitrogen, CKD stage classified  
4 by eGFR<sub>CKD-EPI</sub>, education level, and traditional ECG characteristics [mean heart rate, QRS  
5 duration, Bazett-corrected QT interval, Cornell voltage, and sex-specific ECG – LVH].

#### 6 *Analysis of circular variables*

7 Spatial QRS-T angle, SVG azimuth, and SVG elevation are circular variables. By  
8 convention, QRS-T and SVG elevation angles can be only positive, ranging from 0 to 180  
9 degrees. Distributions of QRS-T angle and SVG elevation angle were normal or nearly normal.  
10 Thus, QRS-T and SVG elevation angles were included in all conventional statistical analyses  
11 without transformation. The SVG azimuth angle is expressed as an axial variable, ranging from -  
12 180° to +180°. As recommended for the circular statistics<sup>25</sup>, we transformed SVG azimuth by  
13 doubling its value and then adding 360°. Then we analyzed the SVG azimuth using a  
14 conventional statistical approach, and for interpretation, we transformed it back.

#### 15 *Survival analyses*

16 For an adequate comparison of separate GEH measurements, we assessed the hazard of SCD  
17 per 1 SD of continuous GEH variables, one-by-one. Similar models were constructed for  
18 traditional global ECG variables, one-by-one: heart rate, QRS duration, QTc, and Cornell  
19 voltage. Cox proportional hazards and Fine-Gray competing risks models were constructed. The  
20 proportional-hazards assumption was tested based on Schoenfeld residuals, using *stcox PH-*  
21 *assumptions* suite of tests implemented in STATA (StataCorp LP, College Station, TX). To  
22 adjust for possible confounders, we constructed three models, performed a statistical test for  
23 interaction with sex in each model, and constructed sex-stratified Cox models for men and

1 women. The proportional-hazards assumption was confirmed for all predictors of interest in most  
2 models. Exceptions were reported. Relative hazard ratio (RHR) with a 95% confidence interval  
3 (CI) of SCD risk for women relative to men was reported, assuming HR for men is a reference  
4 (equal to 1).

5 Model 1 was adjusted for: age and combinations of race and study center, prevalent HF,  
6 CHD, stroke, diabetes, hypertension, postmenopausal state, education level, current smoking,  
7 alcohol intake, leisure physical activity level, BMI category, use of antihypertensive and  
8 antiarrhythmic medications, levels of total cholesterol, HDL, and triglycerides, serum  
9 concentrations of sodium, potassium, calcium, magnesium, phosphorus, and uric acid, total  
10 protein and albumin, blood urea nitrogen, CKD stage classified by  $eGFR_{CKD-EPI}$ , and sex-specific  
11 ECG-LVH. To avoid collinearity, models for Cornell voltage were not adjusted for ECG-LVH.  
12 Associations of continuous ECG variables with SCD were also evaluated using adjusted (model  
13 1) Cox regression models incorporating cubic splines with 4 knots. The positions of the 4 knots  
14 in the cubic spline models are reported in Supplemental Table 1.

15 To determine whether global ECG measures associated with SCD independently from the  
16 dynamic substrate of structural heart disease, time-updated model 2 included time-updated ECG  
17 predictors (one-by-one), all baseline covariates included in model 1, and time-updated incident  
18 nonfatal CVD (AF, HF, CHD, and stroke).

19 In addition, to determine whether GEH is associated with SCD independently from time-  
20 updated traditional ECG measures, time-updated ECG-adjusted model 3 included time-updated  
21 GEH metrics (one-by-one), all four time-updated traditional ECG measurements (heart rate,  
22 QTc, QRS, and Cornell voltage), baseline clinical covariates, and time-updated incident nonfatal  
23 CVD included in model 2.

1 To study competing risks of SCD and nonSCD, we constructed Fine and Gray's competing  
2 risks models for SCD and nonSCD outcomes, using the same covariates as described above for  
3 Cox models 1 and 2. Relative sub-hazard ratio (RSHR) with 95% CI of SCD risk for women  
4 relative to men was reported, assuming SHR for men is a reference.

5 Statistical analyses were performed using STATA MP 15.1 (StataCorp LP, College Station,  
6 TX). Considering the many multivariate analyses performed, statistical significance at the 0.05  
7 level should be interpreted cautiously.

## 8 **Results**

### 9 *Study population*

10 Women comprised more than half of the study population (Table 1). Greater than half of the  
11 women were postmenopausal. At baseline, women had a lower prevalence of CVD as compared  
12 to men. Men had less favorable lipid profiles, were more likely current smokers and alcohol  
13 users, and were less physically active. However, there was a similar prevalence of diabetes and  
14 hypertension in men and women. There were significant differences in electrolytes and kidney  
15 function between men and women. Women had a faster heart rate, longer QTc, and a narrower  
16 QRS.

### 17 *Differences in GEH between men and women*

18 In both unadjusted and adjusted analyses, QRS-T angle and SAI QRST were significantly  
19 larger in men as compared to women. (Table 2 and Supplemental Figure 1). In contrast, sex  
20 differences in SVG magnitude were explained by covariates. SVG vector pointed more upward  
21 and forward in men, and the difference in SVG direction not only remained significant after full  
22 adjustment but increased up to 15-17 degrees.

1 ***EP substrate of sudden cardiac death in men and women in Cox regression analysis***

2 Over a median follow-up of 24.4 years, there were 530 SCDs (incidence 1.72; 95% CI 1.58-  
3 1.88 per 1000 person-years), 2,178 nonSCDs (incidence 7.09; 95% CI 6.80-7.39 per 1000  
4 person-years), and 2,535 noncardiac deaths (incidence 8.25; 95% CI 7.93-8.58 per 1000 person-  
5 years). Incidence of SCD was higher in men (2.56; 95% CI 2.30-2.84 per 1000 person-years) than  
6 in women (1.10; 95% CI 0.95-1.26 per 1000 person-years). Incidence of nonSCD was also higher  
7 in men (8.51; 95% CI 8.03-9.03 per 1000 person-years) than in women (6.01; 95% CI 5.66-6.38  
8 per 1000 person-years). Similarly, noncardiac death was also more frequent in men (incidence  
9 10.51; 95% CI 9.97-11.08 per 1000 person-years) than in women (incidence 6.54; 95% CI 6.17-  
10 6.93 per 1000 person-years).

11 In Cox model 1, QRS-T angle, SVG direction, heart rate, and Cornell voltage were  
12 associated with SCD (Figure 1 and Supplemental Table 2). Further adjustment for time-updated  
13 CHD, HF, AF, and stroke strengthened the association of nearly all ECG metrics with SCD. In  
14 Cox model 2, all studied ECG metrics, except SVG magnitude, were associated with SCD.

15 We observed a statistically significant interaction of sex with SAI QRST, SVG magnitude,  
16 and QRS duration (Figure 1 and Supplemental Table 2). In model 1, there was a 19-27% higher  
17 risk of SCD in women compared to men, per one SD of SVG magnitude, SAI QRST, and QRS  
18 duration. Adjustment for incident nonfatal CVD in model 2 further strengthened the interaction  
19 of sex with SVG magnitude and revealed significant interaction with Cornell voltage. However,  
20 model 2 attenuated the interaction with SAI QRST and wiped out the interaction with QRS  
21 duration.

22 Sex-stratified Cox models confirmed a significant association of traditional and novel global  
23 ECG metrics with SCD (Figure 2 and Supplemental Table 2B). Larger SVG magnitude pointed

1 towards a higher risk of SCD in women. In contrast, a larger SVG magnitude trended towards a  
2 lower risk of SCD in men. The strength of the association of SVG magnitude with SCD did not  
3 reach statistical significance, but opposite trends were seen (Supplemental Figure 2H). After full  
4 adjustment for nonfatal incident CVD, there was a 24% increase SCD risk in women versus 10%  
5 in men with one SD increase in Cornell voltage. Similarly, there was a 19% increase in SCD risk  
6 in women versus 9% in men with one SD of SAI QRST.

7 Interaction of SVG magnitude and SAI QRST with sex remained significant after further  
8 adjustment for time-updated traditional ECG metrics (heart rate, QTc, QRS, and Cornell voltage)  
9 in model 3. In women, greater SVG magnitude was associated with a higher risk of SCD,  
10 whereas in men, bigger SVG magnitude and SAI QRST tended to be protective (Supplemental  
11 Table 2B).

### 12 ***Competing risks of SCD and nonSCD***

13 In a competing risk model 1, one SD increase in spatial QRS-T angle or SVG direction  
14 (azimuth and elevation) was associated with a 10-19% increase in odds of SCD occurrence  
15 (Supplemental Table 3A and Figure 3). Traditional ECG metrics were not associated with SCD  
16 in the competing risks analysis. Competing risk model 2 only slightly attenuated the association  
17 of QRS-T angle, SVG elevation, and SVG azimuth with SCD, and revealed a significant  
18 association of QRS duration with SCD.

19 In competing risk model 1, QRS-T angle, SVG azimuth, Cornell voltage, QTc, and heart rate  
20 were associated with an increased incidence of nonSCD (Figure 3 and Supplemental Table 3A).  
21 Of note, greater SVG magnitude was associated with *decreased* incidence of nonSCD. Incident  
22 nonfatal CVD explained the association of QTc and Cornell voltage with nonSCD, whereas heart  
23 rate remained independently associated with nonSCD even after adjustment in model 2. Of note,

1 after adjustment in model 2, SAI QRST, QRS duration, QRS-T angle, and SVG magnitude were  
2 associated with *decreased* incidence of nonSCD, mirroring observed *increased* incidence of SCD  
3 associated with these ECG metrics in competing risk model 2 for SCD.

#### 4 ***Relative competing risk of SCD and nonSCD in women as compared to men***

5 In competing risk model 1, a statistically significant interaction of sex with competing risk of  
6 SCD was observed for QTc, QRS duration, and SAI QRST. Women experienced a greater  
7 increase in odds of SCD occurrence compared to men: by 27% per SD of QRS duration, 16% per  
8 SD of SAI QRST, and 15% per SD of QTc interval.

9 Adjustment for dynamic CVD substrate eliminated the interaction with QTc and QRS  
10 duration, suggesting that sex differences in SCD risk conveyed by QTc and QRS duration were  
11 explained by sex differences in structural heart disease substrate. Model 2, however, revealed  
12 significant interaction of sex with SVG magnitude and Cornell voltage, in addition to interaction  
13 with SAI QRST. After full adjustment for incident CVD, SVG magnitude, SAI QRST, and  
14 Cornell voltage were associated with 16-23% increase in odds of SCD occurrence in women as  
15 compared to men (Figure 3 and Supplemental Table 3A).

16 A few interactions were observed for competing risk of nonSCD in model 1, but not in model  
17 2. This suggests that sex differences in the risk of nonSCD were explained by incident nonfatal  
18 CVD.

19 In sex-stratified analyses (Figure 4 and Supplemental Table 3B), in adjusted for baseline  
20 confounders model 1, QTc, QRS, and SAI QRST were associated with increased odds of SCD  
21 occurrence by 18-26% in women, but not in men. In men, but not in women, QTc prolongation  
22 and smaller peak SVG magnitude were associated with an increased incidence of nonSCD.

1 When adjusted for dynamic CVD substrate in model 2, in women, larger SAI QRST, QRS  
2 duration, SVG magnitude, and Cornell voltage were associated with greater odds of SCD. As  
3 expected in mirroring competing risk model, smaller SAI QRST, QRS duration, SVG magnitude,  
4 and Cornell voltage were associated with an increased incidence of nonSCD.

5 Across all comparisons and models, peak-based and area-based GEH metrics displayed  
6 consistent results, reassuring robustness of analyses.

## 7 **Discussion**

8 Our study of a large, community-based prospective cohort of over 14,000 participants with  
9 greater than 24 years median follow-up showed that sex is a significant modifier with respect to  
10 the association of EP substrate with SCD (Figure 5). In women, global EP substrate (QRS  
11 duration, Cornell voltage, SAI QRST, SVG magnitude, heart rate, and QTc) was associated with  
12 up to 27% greater risk of SCD than in men. Our findings have important clinical implications:  
13 development of sex-specific risk score of SCD is necessary, and the addition of global EP  
14 substrate metrics in the risk prediction model for women is warranted. Further studies of  
15 mechanisms behind global EP substrate in men and women are needed for the development of  
16 sex-specific prevention of SCD. Theoretically, there are two major groups of mechanisms behind  
17 the observed effect modification: differences in the cardiac EP substrate between men and  
18 women, and differences in structural heart disease substrate.

### 19 ***Why does EP substrate associated with greater risk of SCD in women? EP hypothesis.***

20 Our study showed that after rigorous adjustment for baseline demographic and clinical risk  
21 factors of SCD, including prevalent CVD and CV risk factors, postmenopausal state, serum  
22 concentrations of electrolytes and degree of CKD, several traditional ECG metrics (QRS

1 duration, heart rate, and QTc), Cornell voltage, and voltage-based GEH metrics (SAI QRST and  
2 SVG magnitude) were associated with greater SCD risk in women than in men. In men, EP  
3 substrate was explained by an underlying CVD, whereas in women, EP substrate conveyed an  
4 additional risk of SCD, beyond the risk carried by the prevalent CVD and CV risk factors.

5 The most remarkable difference in the risk of SCD between men and women was conveyed  
6 by amplitude-based ECG metrics: Cornell voltage, SAI QRST, and SVG magnitude.

7 Importantly, the interaction of sex with amplitude-based ECG metrics was independent not only  
8 from baseline CVD and its risk factors but also from incident CVD, and it was consistently  
9 observed in both Cox regression analysis and competing risk models. One SD increase in Cornell  
10 voltage was associated with more than 20% higher risk of SCD in women as compared to men.  
11 Our finding is consistent with a recent autopsy SCD study in the Finnish population, which  
12 observed ECG-LVH more commonly in female than male SCD victims.<sup>26</sup>

13 We observed that one SD increase in the magnitude of SVG (expressed either as SVG vector  
14 magnitude, or SVG's scalar, SAI QRST) was associated with approximately 20% higher risk of  
15 SCD in women as compared to men. A recent Finnish study demonstrated results consistent with  
16 our findings of sex differences in SAI QRST and its association with fatal CVD,<sup>27</sup> although it did  
17 not specifically include SCD. The magnitude of SVG and SAI QRST are global measures of the  
18 dispersion of total recovery time in the heart, encompassing dispersion of activation and  
19 refractoriness.<sup>28</sup> Women have greater asymmetry in potassium channel expression between left  
20 and right ventricles.<sup>29</sup> In a recent genome-wide association study, SAI QRST and SVG  
21 magnitude were associated with genetic polymorphisms tagging *HAND1* and *TBX3* genes,  
22 involving mechanisms of left to right asymmetry in the heart.<sup>30</sup> We speculate that SVG  
23 magnitude and SAI QRST reflect differences in cardiac electrophysiology between men and



1 women, which are responsible for the stronger association of SAI QRST and SVG magnitude  
2 with SCD in women than in men.

3 We demonstrated that QRS duration is associated with more than 20% higher SCD risk in  
4 women than in men, as demonstrated by both Cox regression and competing risks analyses. Sex  
5 differences in SCD risk conveyed by QRS duration were largely explained by sex differences in  
6 dynamic structural heart disease substrate. Existing literature on the association between QRS  
7 duration and SCD is inconsistent, likely owing at least in part to the study populations having  
8 very few women (1-16%) and the majority of analyses lacking stratification by sex.<sup>31-33</sup> Similar  
9 mechanisms may be responsible for why women derive greater benefit from cardiac  
10 resynchronization therapy which remains incompletely understood.<sup>9</sup>

#### 11 ***Comparison of Cox proportional hazards and Fine-Gray competing risk regression results.***

12 SCD and nonSCD events are naturally competing, tightly intertwined events and cannot be  
13 studied in isolation. CVD continuum encompasses progression from CVD risk factors to  
14 subclinical and then to clinically manifested CVD, and, ultimately to either SCD or nonSCD. To  
15 develop a greater understanding of relationships between EP substrate and SCD and effect  
16 modification by sex, we fitted both Cox regression and competing risk models, and appropriately  
17 interpreted the regression coefficients from the subdistribution hazard model.<sup>34</sup> It was previously  
18 shown that when the probability of an event is less than 0.2, the logistic link function and the  
19 complementary log-log link function are very similar,<sup>34</sup> and a subdistribution hazard model can  
20 be interpreted as odds ratios for the cumulative incidence function. In this study, the probability  
21 of SCD, but not a probability of nonSCD met these criteria. In this study, voltage-based ECG  
22 metrics (SVG magnitude, SAI QRST, Cornell voltage) and QRS duration demonstrated greater  
23 risk of SCD for women as compared to men in both Cox and Fine-Gray models. However, QTc

1 and heart rate were stronger associated with SCD in women than in men in competing risk  
2 models only, but not in Cox models. Statistically significant interactions with sex revealed in  
3 Fine-Gray models highlight the importance of competing risk analysis for understanding  
4 complex relationships of EP substrate with SCD and nonSCD in men and women.

5 Our study showed that in women, QTc is associated with greater odds of SCD, whereas in  
6 men, QTc is associated with greater incidence of nonSCD. While QT prolongation is a known  
7 risk marker of torsades de pointes (TdP) in congenital long QT syndrome,<sup>35</sup> in other populations,  
8 the association of QT interval with SCD was controversial.<sup>36</sup> One possible reason for controversy  
9 around the association of QTc with SCD can be explained by differences in the proportion and  
10 clinical characteristics of women enrolled in previous studies. No prior studies tested statistical  
11 interaction of sex with QTc after extensive adjustment for confounders. Consistently with our  
12 findings, the Rotterdam study showed an association of QT prolongation with SCD only in the  
13 absence of cardiac dysfunction, whereas, in patients with systolic HF, risk of SCD was  
14 independent of QT prolongation.<sup>37</sup> Similarly, OregonSUDS study reported the stronger  
15 association of QTc prolongation with SCD in diabetes-free individuals as compared to those with  
16 diabetes.<sup>38</sup> Women have a longer QT interval due to reduced expression of potassium channels,  
17 resulting in decreased rapid and slow delayed rectifier K<sup>+</sup> currents, inward rectifier current, and  
18 transient outward current.<sup>39, 40</sup> Estrogens inhibit the rapid delayed rectifier current, increase the  
19 L-type calcium current, the sodium-calcium exchange current, and calcium release mediated by  
20 the ryanodine receptor, which can predispose to triggered activity.<sup>41</sup> Two-thirds of the drug-  
21 induced TdP cases occur in women.<sup>42</sup> Thus, in women, QTc carries additional risk of SCD due to  
22 sex-specific EP mechanisms, independent of common for men and women CVD substrate.

1 In this study, resting heart rate was associated with greater odds of SCD in women but not in  
2 men. Association of a resting heart rate with SCD in women was independent of incident CVD,  
3 supporting previous OregonSUDS findings.<sup>43</sup> Women have faster resting heart rate<sup>9</sup> mostly  
4 because of smaller LV mass and volume, resulting in lesser exercise capacity in women than in  
5 men.<sup>44</sup> Exercise capacity is associated with cardiac arrhythmias.<sup>45</sup> Our results suggest that lesser  
6 exercise capacity in women, manifesting by faster resting heart rate, translates into the stronger  
7 association of heart rate with SCD in women, which is independent of the CVD development.

### 8 *Sex differences in structural heart disease substrate.*

9 In this study, non-fatal incident CVD explained the stronger association of QTc and QRS  
10 duration with SCD in women, as compared to men. On another hand, sex did not modify the  
11 association of studied ECG features with nonSCD. This finding is in accord with known  
12 differences in structural heart disease between men and women. In spite of less frequent  
13 obstructive CHD, women with angina or MI have greater cardiac mortality than men.<sup>46, 47</sup>  
14 Women have different coronary microvasculature and greater arteriolar wall thickness than  
15 men.<sup>48</sup> On the other hand, men are more likely to develop cardiac amyloidosis (manifesting by  
16 small ECG voltage), and subsequently HF.<sup>49</sup> Thus, in women, QTc and QRS duration reflect an  
17 underlying structural heart disease with greater than in men risk of proarrhythmia, whereas, in  
18 men, QTc and QRS duration reflect an underlying structural heart disease leading to pump  
19 failure and eventually, more likely to nonSCD.

### 20 *Differences in GEH between men and women*

21 Consistent with previous studies in healthy young individuals<sup>50</sup> and young athletes<sup>12</sup>, we  
22 observed wider QRS-T angle, larger SAI QRST, and SVG vector pointing more upward and  
23 forward in middle-aged men than in middle-aged women. Of note, our study revealed that

1 differences in SVG magnitude between men and women are explained by differences in body  
2 size, and other clinical characteristics, both cardiac and non-cardiac, suggesting that  
3 fundamentally, there is no difference in the magnitude of gradient between the longest and the  
4 shortest action potential duration between male and female heart.

#### 5 ***Clinical implications of greater risk of SCD associated with global EP substrate in women***

6 We observed the significantly stronger association of several ECG metrics of underlying EP  
7 substrate (QRS duration, Cornell voltage, SAI QRST, SVG magnitude, heart rate, and QTc) with  
8 SCD in women than in men. Therefore, the addition of these ECG metrics in the risk prediction  
9 model for women is warranted for the development of a sex-specific risk score of SCD in  
10 women. Our results indicate that significant improvement in SCD risk prediction for women can  
11 be made. Improvement of SCD risk stratification is especially important for women considering  
12 primary prevention ICD.<sup>4</sup> Further studies of sex-specific EP substrate in men and women are  
13 needed for the development of future therapies.

#### 14 ***Strengths and Limitations***

15 This is a large community-based prospective cohort study with long-term follow-up, well-  
16 adjudicated SCD, and approximately equal representation of men and women, providing unique  
17 opportunity to study sex exposure as an effect modifier. The well-characterized population of the  
18 ARIC study allowed us to perform comprehensive adjustment for confounders, including post-  
19 menopausal state, electrolytes, and kidney function, accounting for important non-cardiac  
20 differences between men and women. However, limitations of the study have to be taken into  
21 account. The study population was predominantly white; only 26% of the study participants were  
22 black. Validation of the study finding in a multiracial population is needed. Due to the lack of  
23 information on baseline LVEF for most of the study participants, we did not adjust our analyses

1 for baseline LVEF. Nevertheless, we adjusted our analyses for incident HF and conducted  
2 competing risk analyses, sufficiently accounting for competing risk of a pump failure death.

### 3 ***Acknowledgments:***

4 The authors thank the staff and participants of the ARIC study for their important  
5 contributions. We would like to acknowledge the SCD mortality classification committee  
6 members: Nona Sotoodehnia (lead), Selcuk Adabag, Sunil Agarwal, Lin Chen, Rajat Deo,  
7 Leonard Ilkhanoff, Liviu Klein, Saman Nazarian, Ashleigh Owen, Kris Patton, and Larisa  
8 Tereshchenko.

### 9 ***Funding Sources:***

10 The Atherosclerosis Risk in Communities study has been funded in whole or in part with  
11 Federal funds from the National Heart, Lung, and Blood Institute, National Institutes of Health,  
12 Department of Health and Human Services, under Contract nos. (HHSN268201700001I,  
13 HHSN268201700002I, HHSN268201700003I, HHSN268201700004I, HHSN268201700005I).  
14 This work was supported by HL118277 (LGT), and OHSU President Bridge funding (LGT).

### 15 ***Disclosures***

16 None.

17

1

## References

- 2 1. Waks JW, Sitlani CM, Soliman EZ, Kabir M, Ghafoori E, Biggs ML, Henrikson CA,  
3 Sotoodehnia N, Biering-Sorensen T, Agarwal SK, Siscovick DS, Post WS, Solomon SD, Buxton  
4 AE, Josephson ME and Tereshchenko LG. Global Electric Heterogeneity Risk Score for  
5 Prediction of Sudden Cardiac Death in the General Population: The Atherosclerosis Risk in  
6 Communities (ARIC) and Cardiovascular Health (CHS) Studies. *Circulation*. 2016;133:2222-34.
- 7 2. Chugh SS, Uy-Evanado A, Teodorescu C, Reinier K, Mariani R, Gunson K and Jui J.  
8 Women have a lower prevalence of structural heart disease as a precursor to sudden cardiac  
9 arrest: The Ore-SUDS (Oregon Sudden Unexpected Death Study). *J Am Coll Cardiol*.  
10 2009;54:2006-11.
- 11 3. Curtis LH, Al-Khatib SM, Shea AM, Hammill BG, Hernandez AF and Schulman KA.  
12 Sex differences in the use of implantable cardioverter-defibrillators for primary and secondary  
13 prevention of sudden cardiac death. *JAMA*. 2007;298:1517-24.
- 14 4. Ghanbari H, Dalloul G, Hasan R, Daccarett M, Saba S, David S and Machado C.  
15 Effectiveness of implantable cardioverter-defibrillators for the primary prevention of sudden  
16 cardiac death in women with advanced heart failure: a meta-analysis of randomized controlled  
17 trials. *ArchInternMed*. 2009;169:1500-1506.
- 18 5. Tompkins CM, Kutuyifa V, Arshad A, McNitt S, Polonsky B, Wang PJ, Moss AJ and  
19 Zareba W. Sex Differences in Device Therapies for Ventricular Arrhythmias or Death in the  
20 Multicenter Automatic Defibrillator Implantation Trial With Cardiac Resynchronization Therapy  
21 (MADIT-CRT) Trial. *J Cardiovasc Electrophysiol*. 2015;26:862-871.
- 22 6. MacFadden DR, Crystal E, Krahn AD, Mangat I, Healey JS, Dorian P, Birnie D,  
23 Simpson CS, Khaykin Y, Pinter A, Nanthakumar K, Calzavara AJ, Austin PC, Tu JV and Lee

- 1 DS. Sex differences in implantable cardioverter-defibrillator outcomes: findings from a  
2 prospective defibrillator database. *Ann Intern Med.* 2012;156:195-203.
- 3 7. Russo AM, Daugherty SL, Masoudi FA, Wang Y, Curtis J and Lampert R. Gender and  
4 outcomes after primary prevention implantable cardioverter-defibrillator implantation: Findings  
5 from the National Cardiovascular Data Registry (NCDR). *American Heart Journal.*  
6 2015;170:330-338.
- 7 8. Al-Khatib SM, Stevenson WG, Ackerman MJ, Bryant WJ, Callans DJ, Curtis AB, Deal  
8 BJ, Dickfeld T, Field ME, Fonarow GC, Gillis AM, Granger CB, Hammill SC, Hlatky MA,  
9 Joglar JA, Kay GN, Matlock DD, Myerburg RJ and Page RL. 2017 AHA/ACC/HRS guideline  
10 for management of patients with ventricular arrhythmias and the prevention of sudden cardiac  
11 death: Executive summary: A Report of the American College of Cardiology/American Heart  
12 Association Task Force on Clinical Practice Guidelines and the Heart Rhythm Society. *Heart*  
13 *Rhythm.* 2018;15:e190-e252.
- 14 9. Gillis AM. Atrial Fibrillation and Ventricular Arrhythmias: Sex Differences in  
15 Electrophysiology, Epidemiology, Clinical Presentation, and Clinical Outcomes. *Circulation.*  
16 2017;135:593-608.
- 17 10. Tereshchenko LG. Electrocardiogram as a screening tool in the general population: A  
18 strategic review. *Journal of Electrocardiology.* 2013;46:553-556.
- 19 11. The Atherosclerosis Risk in Communities (ARIC) Study: design and objectives. The  
20 ARIC investigators. *Am J Epidemiol.* 1989;129:687-702.
- 21 12. Thomas JA, E AP-A, Junell A, Newton K, Hamilton C, Li-Pershing Y, German D,  
22 Bender A and Tereshchenko LG. Vectorcardiogram in athletes: The Sun Valley Ski Study. *Ann*  
23 *Noninvasive Electrocardiol.* 2019;24:e12614.

- 1 13. Perez-Alday EA, Li-Pershing Y, Bender A, Hamilton C, Thomas JA, Johnson K, Lee TL,  
2 Gonzales R, Li A, Newton K and Tereshchenko LG. Importance of the heart vector origin point  
3 definition for an ECG analysis: The Atherosclerosis Risk in Communities (ARIC) study. *Comput*  
4 *Biol Med.* 2019;104:127-138.
- 5 14. White AD, Folsom AR, Chambless LE, Sharret AR, Yang K, Conwill D, Higgins M,  
6 Williams OD and Tyroler HA. Community surveillance of coronary heart disease in the  
7 Atherosclerosis Risk in Communities (ARIC) Study: methods and initial two years' experience.  
8 *Journal of clinical epidemiology.* 1996;49:223-33.
- 9 15. O'Neal WT, Singleton MJ, Roberts JD, Tereshchenko LG, Sotoodehnia N, Chen LY,  
10 Marcus GM and Soliman EZ. Association Between QT-Interval Components and Sudden  
11 Cardiac Death: The ARIC Study (Atherosclerosis Risk in Communities). *Circ Arrhythm*  
12 *Electrophysiol.* 2017;10.
- 13 16. Luepker RV, Apple FS, Christenson RH, Crow RS, Fortmann SP, Goff D, Goldberg RJ,  
14 Hand MM, Jaffe AS, Julian DG, Levy D, Manolio T, Mendis S, Mensah G, Pajak A, Prineas RJ,  
15 Reddy KS, Roger VL, Rosamond WD, Shahar E, Sharrett AR, Sorlie P and Tunstall-Pedoe H.  
16 Case definitions for acute coronary heart disease in epidemiology and clinical research studies: a  
17 statement from the AHA Council on Epidemiology and Prevention; AHA Statistics Committee;  
18 World Heart Federation Council on Epidemiology and Prevention; the European Society of  
19 Cardiology Working Group on Epidemiology and Prevention; Centers for Disease Control and  
20 Prevention; and the National Heart, Lung, and Blood Institute. *Circulation.* 2003;108:2543-2549.
- 21 17. Eriksson H, Caidahl K, Larsson B, Ohlson LO, Welin L, Wilhelmsen L and Svardsudd K.  
22 Cardiac and pulmonary causes of dyspnoea--validation of a scoring test for clinical-  
23 epidemiological use: the Study of Men Born in 1913. *Eur Heart J.* 1987;8:1007-14.



- 1 18. Loehr LR, Rosamond WD, Chang PP, Folsom AR and Chambless LE. Heart failure  
2 incidence and survival (from the Atherosclerosis Risk in Communities study). *Am J Cardiol.*  
3 2008;101:1016-1022.
- 4 19. Matsushita K, Selvin E, Bash LD, Astor BC and Coresh J. Risk implications of the new  
5 CKD Epidemiology Collaboration (CKD-EPI) equation compared with the MDRD Study  
6 equation for estimated GFR: the Atherosclerosis Risk in Communities (ARIC) Study. *Am J*  
7 *Kidney Dis.* 2010;55:648-659.
- 8 20. Richardson MT, Ainsworth BE, Wu HC, Jacobs DR, Jr. and Leon AS. Ability of the  
9 Atherosclerosis Risk in Communities (ARIC)/Baecke Questionnaire to assess leisure-time  
10 physical activity. *Int J Epidemiol.* 1995;24:685-93.
- 11 21. Nabulsi AA, Folsom AR, Szklo M, White A, Higgins M and Heiss G. No association of  
12 menopause and hormone replacement therapy with carotid artery intima-media thickness.  
13 Atherosclerosis Risk in Communities (ARIC) Study Investigators. *Circulation.* 1996;94:1857-  
14 63.
- 15 22. Toole JF, Chambless LE, Heiss G, Tyroler HA and Paton CC. Prevalence of stroke and  
16 transient ischemic attacks in the atherosclerosis risk in communities (ARIC) study. *Annals of*  
17 *Epidemiology.* 1993;3:500-503.
- 18 23. Alonso A, Agarwal SK, Soliman EZ, Ambrose M, Chamberlain AM, Prineas RJ and  
19 Folsom AR. Incidence of atrial fibrillation in whites and African-Americans: the Atherosclerosis  
20 Risk in Communities (ARIC) study. *Am Heart J.* 2009;158:111-7.
- 21 24. Rosamond WD, Folsom AR, Chambless LE, Wang CH, McGovern PG, Howard G,  
22 Copper LS and Shahar E. Stroke incidence and survival among middle-aged adults: 9-year  
23 follow-up of the Atherosclerosis Risk in Communities (ARIC) cohort. *Stroke.* 1999;30:736-743.

- 1 25. Cox NJ. Speaking Stata: In Praise of Trigonometric Predictors. *The Stata Journal*.  
2 2006;6:561-579.
- 3 26. Haukilahti MAE, Holmstrom L, Vahatalo J, Kentta T, Tikkanen J, Pakanen L,  
4 Kortelainen ML, Perkiomaki J, Huikuri H, Myerburg RJ and Junttila MJ. Sudden Cardiac Death  
5 in Women. *Circulation*. 2019;139:1012-1021.
- 6 27. Lipponen JA, Kurl S and Laukkanen JA. Global electrical heterogeneity as a predictor of  
7 cardiovascular mortality in men and women. *Europace*. 2018;20:1841-1848.
- 8 28. Waks JW and Tereshchenko LG. Global electrical heterogeneity: A review of the spatial  
9 ventricular gradient. *J Electrocardiol*. 2016;49:824-830.
- 10 29. Schram G, Pourrier M, Melnyk P and Nattel S. Differential distribution of cardiac ion  
11 channel expression as a basis for regional specialization in electrical function. *Circ Res*.  
12 2002;90:939-50.
- 13 30. Tereshchenko LG, Sotoodehnia N, Sitlani CM, Ashar FN, Kabir M, Biggs ML, Morley  
14 MP, Waks JW, Soliman EZ, Buxton AE, Biering-Sorensen T, Solomon SD, Post WS, Cappola  
15 TP, Siscovick DS and Arking DE. Genome-Wide Associations of Global Electrical  
16 Heterogeneity ECG Phenotype: The ARIC (Atherosclerosis Risk in Communities) Study and  
17 CHS (Cardiovascular Health Study). *J Am Heart Assoc*. 2018;7:e008160.
- 18 31. Dhar R, Alsheikh-Ali AA, Estes NA, 3rd, Moss AJ, Zareba W, Daubert JP, Greenberg H,  
19 Case RB and Kent DM. Association of prolonged QRS duration with ventricular  
20 tachyarrhythmias and sudden cardiac death in the Multicenter Automatic Defibrillator  
21 Implantation Trial II (MADIT-II). *Heart Rhythm*. 2008;5:807-13.

- 1 32. Zimetbaum PJ, Buxton AE, Batsford W, Fisher JD, Hafley GE, Lee KL, O'Toole MF,  
2 Page RL, Reynolds M and Josephson ME. Electrocardiographic predictors of arrhythmic death  
3 and total mortality in the multicenter unsustained tachycardia trial. *Circulation*. 2004;110:766-9.
- 4 33. Iuliano S, Fisher SG, Karasik PE, Fletcher RD and Singh SN. QRS duration and  
5 mortality in patients with congestive heart failure. *Am Heart J*. 2002;143:1085-91.
- 6 34. Austin PC and Fine JP. Practical recommendations for reporting Fine-Gray model  
7 analyses for competing risk data. *Stat Med*. 2017;36:4391-4400.
- 8 35. Jervell A and Lange-Nielsen F. Congenital deaf-mutism, functional heart disease with  
9 prolongation of the Q-T interval and sudden death. *Am Heart J*. 1957;54:59-68.
- 10 36. Surawicz B and Knochel SB. Long QT: good, bad or indifferent? *J Am Coll Cardiol*.  
11 1984;4:398-413.
- 12 37. Algra A, Tijssen JG, Roelandt JR, Pool J and Lubsen J. QTc prolongation measured by  
13 standard 12-lead electrocardiography is an independent risk factor for sudden death due to  
14 cardiac arrest. *Circulation*. 1991;83:1888-94.
- 15 38. Chugh SS, Reinier K, Singh T, Uy-Evanado A, Socoteanu C, Peters D, Mariani R,  
16 Gunson K and Jui J. Determinants of prolonged QT interval and their contribution to sudden  
17 death risk in coronary artery disease: the Oregon Sudden Unexpected Death Study. *Circulation*.  
18 2009;119:663-670.
- 19 39. Gaborit N, Varro A, Le Bouter S, Szuts V, Escande D, Nattel S and Demolombe S.  
20 Gender-related differences in ion-channel and transporter subunit expression in non-diseased  
21 human hearts. *J Mol Cell Cardiol*. 2010;49:639-46.

- 1 40. Tadros R, Ton A-T, Fiset C and Nattel S. Sex Differences in Cardiac Electrophysiology  
2 and Clinical Arrhythmias: Epidemiology, Therapeutics, and Mechanisms. *Canadian Journal of*  
3 *Cardiology*. 2014;30:783-792.
- 4 41. Odening KE and Koren G. How do sex hormones modify arrhythmogenesis in long QT  
5 syndrome? Sex hormone effects on arrhythmogenic substrate and triggered activity. *Heart*  
6 *Rhythm*. 2014;11:2107-15.
- 7 42. Drici MD and Clement N. Is gender a risk factor for adverse drug reactions? The example  
8 of drug-induced long QT syndrome. *Drug Saf*. 2001;24:575-85.
- 9 43. Teodorescu C, Reinier K, Uy-Evanado A, Gunson K, Jui J and Chugh SS. Resting heart  
10 rate and risk of sudden cardiac death in the general population: influence of left ventricular  
11 systolic dysfunction and heart rate-modulating drugs. *Heart Rhythm*. 2013;10:1153-8.
- 12 44. Burke JH, Goldberger JJ, Ehlert FA, Kruse JT, Parker MA and Kadish AH. Gender  
13 differences in heart rate before and after autonomic blockade: Evidence against an intrinsic  
14 gender effect. *The American Journal of Medicine*. 1996;100:537-543.
- 15 45. Andersen K, Rasmussen F, Held C, Neovius M, Tynelius P and Sundstrom J. Exercise  
16 capacity and muscle strength and risk of vascular disease and arrhythmia in 1.1 million young  
17 Swedish men: cohort study. *Bmj*. 2015;351:h4543.
- 18 46. Hemingway H, McCallum A, Shipley M, Manderbacka K, Martikainen P and Keskimaki  
19 I. Incidence and prognostic implications of stable angina pectoris among women and men.  
20 *JAMA*. 2006;295:1404-11.
- 21 47. Simon T, Mary-Krause M, Cambou JP, Hanania G, Gueret P, Lablanche JM, Blanchard  
22 D, Genes N, Danchin N and Investigators U. Impact of age and gender on in-hospital and late

- 1 mortality after acute myocardial infarction: increased early risk in younger women: results from  
2 the French nation-wide USIC registries. *Eur Heart J.* 2006;27:1282-8.
- 3 48. Campbell DJ, Somaratne JB, Jenkins AJ, Prior DL, Yii M, Kenny JF, Newcomb AE,  
4 Kelly DJ and Black MJ. Differences in myocardial structure and coronary microvasculature  
5 between men and women with coronary artery disease. *Hypertension.* 2011;57:186-92.
- 6 49. Connors LH, Sam F, Skinner M, Salinaro F, Sun F, Ruberg FL, Berk JL and Seldin DC.  
7 Heart Failure Resulting From Age-Related Cardiac Amyloid Disease Associated With Wild-  
8 Type Transthyretin: A Prospective, Observational Cohort Study. *Circulation.* 2016;133:282-290.
- 9 50. Sur S, Han L and Tereshchenko LG. Comparison of sum absolute QRST integral, and  
10 temporal variability in depolarization and repolarization, measured by dynamic  
11 vectorcardiography approach, in healthy men and women. *PLoS One.* 2013;8:e57175.  
12

1 **Table 1. Comparison of baseline clinical characteristics in men and women**

| Characteristics                             | Men (n=6,601) | Women(n=8,124) | P-value |
|---------------------------------------------|---------------|----------------|---------|
| Age(SD), y                                  | 54.6(5.8)     | 53.8(5.7)      | <0.0001 |
| White, n(%)                                 | 5,229(78.1)   | 5,886(71.4)    | <0.0001 |
| Postmenopause, n(% of women)                | n/a           | 4,834(59.5)    | n/a     |
| Heart Failure, n(%)                         | 204(3.1)      | 475(5.9)       | <0.0001 |
| Coronary heart disease, n(%)                | 528(8.0)      | 169(2.1)       | <0.0001 |
| Stroke, n(%)                                | 142(2.2)      | 107(1.3)       | <0.0001 |
| Body mass index(SD), kg/m <sup>2</sup>      | 27.5(4.2)     | 27.8(6.1)      | 0.0002  |
| Diabetes, n(%)                              | 784(12.0)     | 948(11.7)      | 0.697   |
| Hypertension, n(%)                          | 2,227(33.7)   | 2,811(34.6)    | 0.272   |
| Antihypertensive drugs, n(%)                | 1,782(27.0)   | 2,664(32.8)    | <0.0001 |
| Current tobacco smoker, n(%)                | 1,809(27.4)   | 2,020(24.9)    | <0.0001 |
| Current alcohol drinker, n(%)               | 4,282(64.9)   | 4,010(49.4)    | <0.0001 |
| Leisure physical activity score(SD)         | 2.34(0.56)    | 2.38(0.59)     | 0.0001  |
| Education less than high school, n(%)       | 1,543(23.4)   | 1,863(22.9)    | 0.526   |
| Total cholesterol(SD), mmol/L               | 5.46(1.03)    | 5.64(1.12)     | <0.0001 |
| HDL cholesterol(SD), mg/dL                  | 44.3(13.8)    | 57.6(17.3)     | <0.0001 |
| Triglycerides(SD), mmol/L                   | 1.60(1.13)    | 1.39(0.92)     | <0.0001 |
| Sodium(SD), mmol/L                          | 140.8(2.4)    | 141.0(2.5)     | <0.0001 |
| Potassium(SD), mmol/L                       | 4.49(0.46)    | 4.37(0.49)     | <0.0001 |
| Calcium(SD), mg/dL                          | 9.76(0.42)    | 9.81(0.44)     | <0.0001 |
| Magnesium(SD), mEq/L                        | 1.64(0.16)    | 1.63(0.16)     | <0.0001 |
| Phosphorus(SD), mg/dL                       | 3.26(0.46)    | 3.57(0.48)     | <0.0001 |
| Total protein(SD), mg/dL                    | 7.27(0.44)    | 7.28(0.46)     | 0.024   |
| Albumin(SD), mg/dL                          | 3.92(0.26)    | 3.83(0.27)     | <0.0001 |
| Blood urea nitrogen(SD), mg/dL              | 16.1(4.3)     | 14.5(4.3)      | <0.0001 |
| Chronic kidney disease stage $\geq$ 2, n(%) | 2,310(35.0)   | 2,247(27.7)    | <0.0001 |
| Uric acid(SD), mg/dL                        | 6.73(1.42)    | 5.48(1.43)     | <0.0001 |
| Use of antiarrhythmic drugs, n(%)           | 1,006(15.2)   | 1,043(12.8)    | <0.0001 |
| Heart rate(SD), bpm                         | 64.6(10.2)    | 67.5(10.0)     | <0.0001 |
| QRS duration(SD), ms                        | 96.9(12.5)    | 88.4(10.7)     | <0.0001 |
| QTc(SD), ms                                 | 411.6(17.0)   | 420.0(20.0)    | <0.0001 |
| Cornell voltage(SD), $\mu$ V                | 1,403(588)    | 1,103(495)     | <0.0001 |
| Sex-specific ECG-LVH, n(%)                  | 423(6.4)      | 419(5.2)       | 0.001   |

2 HDL=High-density lipoprotein; SD=standard deviation

3

1 **Table 2. Difference in GEH variables in women as compared to men**

| GEH characteristic     | Model 1                 |         | Model 2                 |         |
|------------------------|-------------------------|---------|-------------------------|---------|
|                        | Difference (95%CI)      | P-value | Difference (95%CI)      | P-value |
| Peak QRS-T angle, °    | -12.1(-13.1 to -11.0)   | <0.0001 | -8.2(-10.7 to -5.7)     | <0.0001 |
| Area QRS-T angle, °    | -15.5(-16.4 to -14.6)   | <0.0001 | -9.5(-11.6 to -7.5)     | <0.0001 |
| Peak SVG elevation, °  | -5.95(-6.43 to -5.46)   | <0.0001 | -2.33(-3.43 to -1.22)   | <0.0001 |
| Area SVG elevation, °  | -5.01(-5.56 to -4.46)   | <0.0001 | -3.42(-4.74 to -2.10)   | <0.0001 |
| Peak SVG azimuth, °    | +11.27(+9.65 to +12.88) | <0.0001 | +13.58(+9.72 to +17.44) | <0.0001 |
| Area SVG azimuth, °    | +8.94(+7.32 to +10.57)  | <0.0001 | +11.95(+8.16 to +15.74) | <0.0001 |
| SAI QRST, mV*ms        | -33.6(-35.1 to -32.0)   | <0.0001 | -12.1(-15.4 to -8.8)    | <0.0001 |
| Peak SVG magnitude, μV | -51.6(-65.3 to -37.8)   | <0.0001 | +47.6(+12.9 to + 82.3)  | 0.007   |
| SVG magnitude, μV      | -92.7(-107.9 to -77.5)  | <0.0001 | -14.8(-52.2 to -22.7)   | 0.439   |

2

3 **Model 1** was adjusted for age and combination of race and study center. **Model 2** was in  
4 addition adjusted for prevalent heart failure, coronary heart disease, stroke, diabetes,  
5 hypertension, body mass index, postmenopause state, education level, current smoking, current  
6 alcohol intake, leisure physical activity level, use of antihypertensive and antiarrhythmic  
7 medications, levels of total cholesterol, high density lipoprotein, and triglycerides, serum  
8 concentrations of sodium, potassium, calcium, magnesium, phosphorus, and uric acid, level total  
9 protein and albumin, blood urea nitrogen, chronic kidney disease stage classified by eGFR<sub>CKD-</sub>  
10 EPI, mean heart rate, QRS duration, corrected QT interval, Cornell voltage, and sex-specific ECG  
11 – left ventricular hypertrophy.

12

## Figure Legends

**Figure 1.** Adjusted Cox proportional hazard ratio (HR) and 95% confidence interval (CI) of SCD for GEH and traditional global ECG metrics in model 1 (green diamond) and model 2 (orange triangle). Black lines correspond to 95% CI bounds. Left forest plot shows HR with 95%CI for all participants. Right forest plot shows relative HR (RHR) with 95%CI for women as compared to men, with HR for men equal 1.0.

**Figure 2.** Sex-stratified adjusted (models 1 and 2) Cox proportional hazard ratio (HR) and 95% confidence interval (CI) of SCD for GEH and traditional global ECG metrics in men (blue rectangle) and women (red oval). Black lines correspond to 95% CI bounds.

**Figure 3.** Adjusted competing risk sub-hazard ratio (SHR) and 95% confidence interval (CI) of SCD for GEH and traditional global ECG metrics in model 1 (green diamond) and model 2 (orange triangle). Black lines correspond to 95% CI bounds. Left forest plot shows SHR with 95%CI for all participants. Right forest plot shows relative SHR (RSHR) with 95%CI for women as compared to men, with SHR for men equal 1.0.

**Figure 4.** Sex-stratified adjusted (models 1 and 2) competing risk sub-hazard ratio (SHR) and 95% confidence interval (CI) of SCD and nonSCD for GEH and traditional global ECG metrics in men (blue rectangle) and women (red oval). Black lines correspond to 95% CI bounds.

**Figure 5.** Summary of findings



Figure 1:

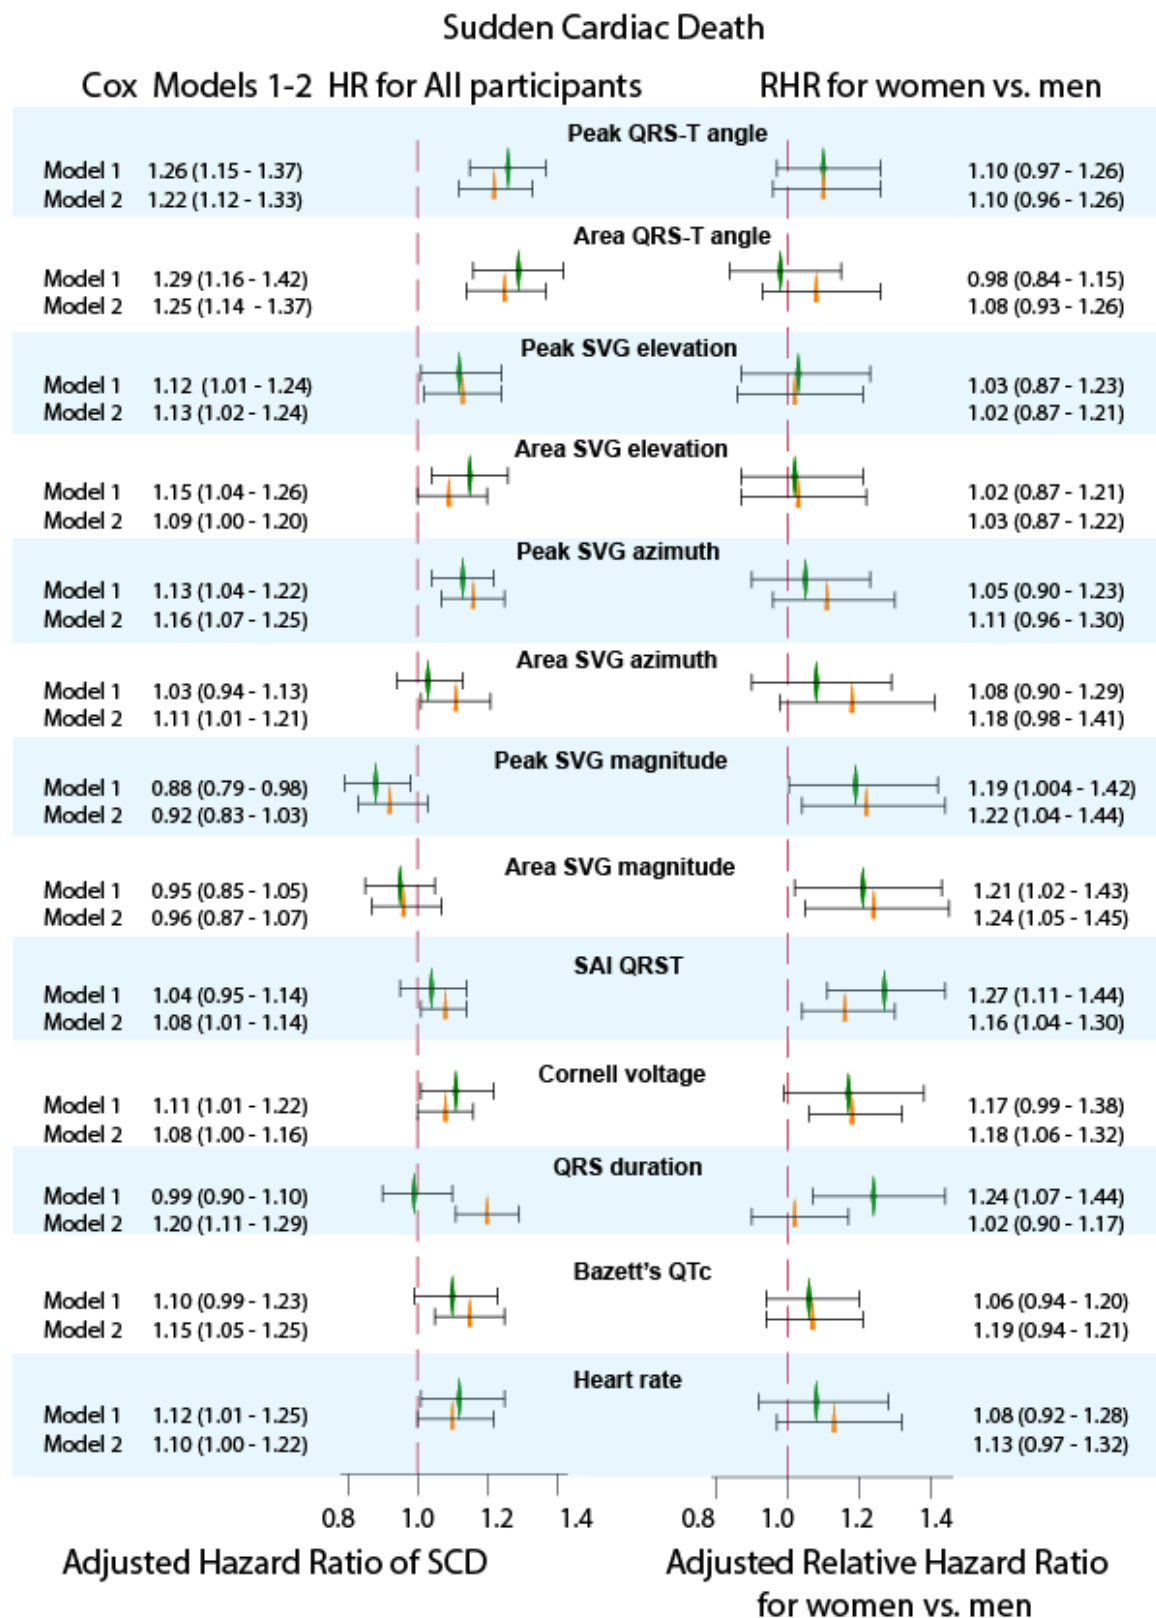

**Figure 2:**

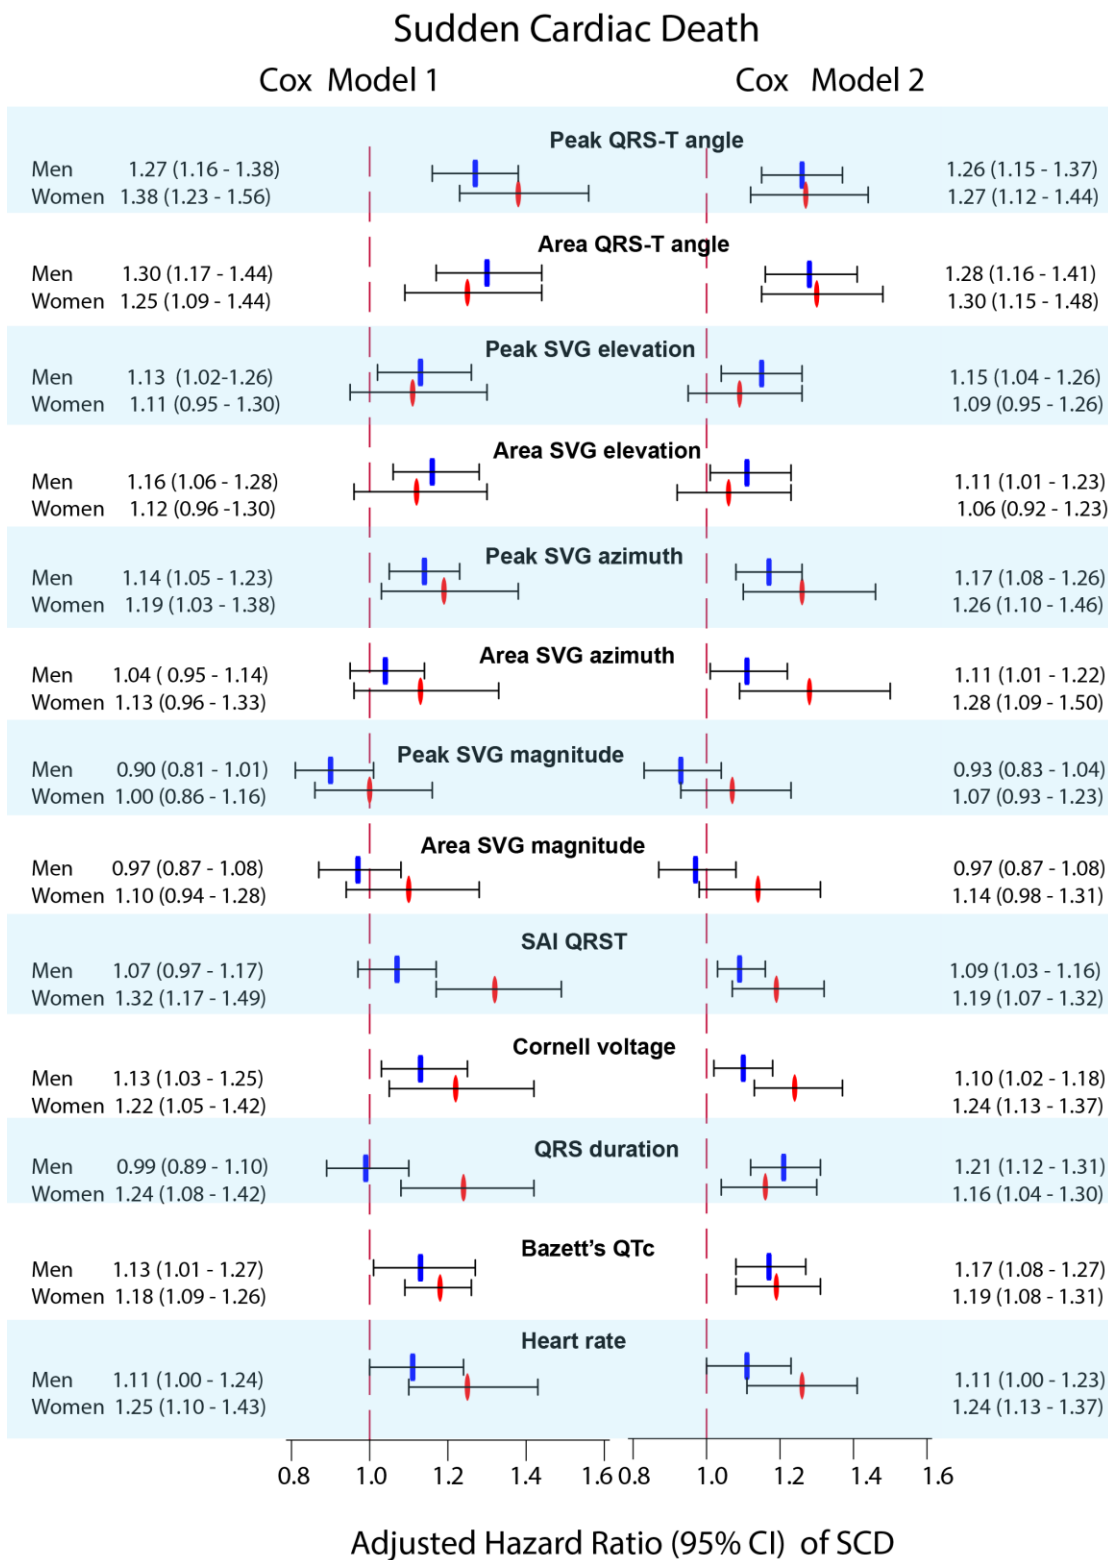

Figure 3:

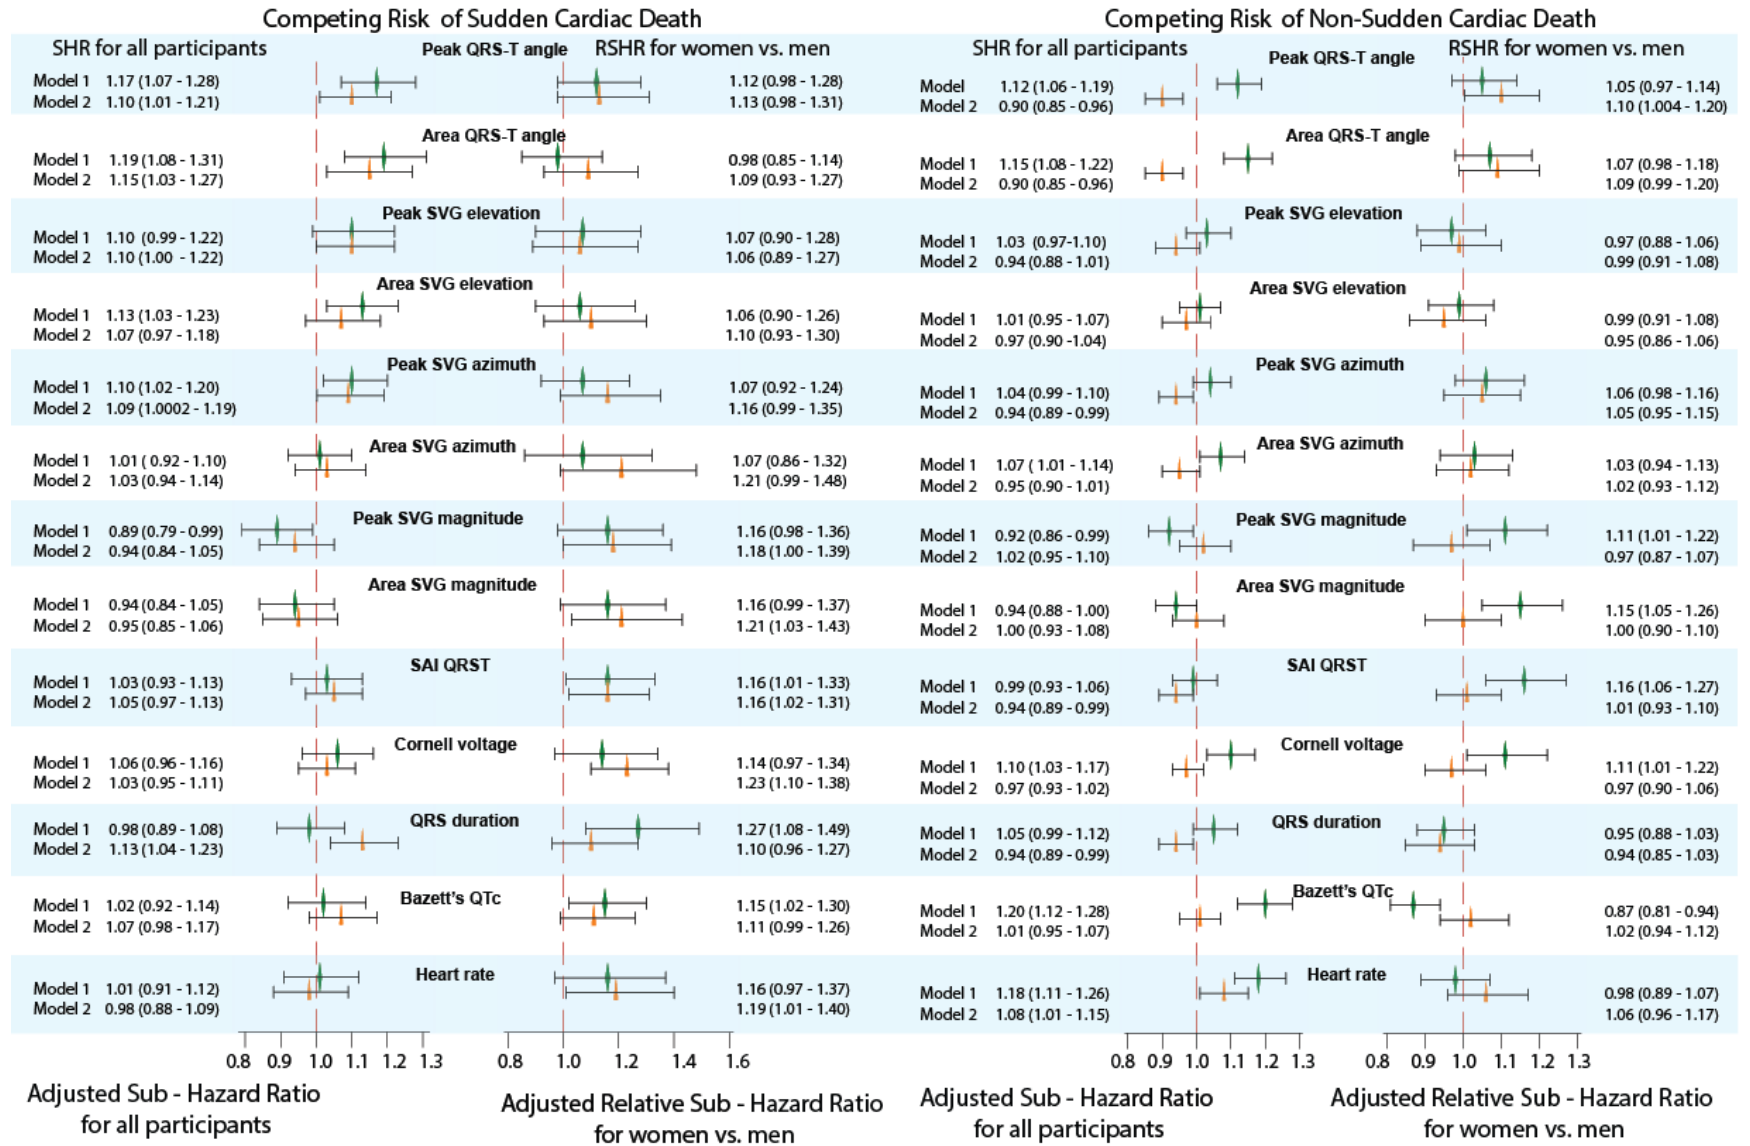

Figure 4:

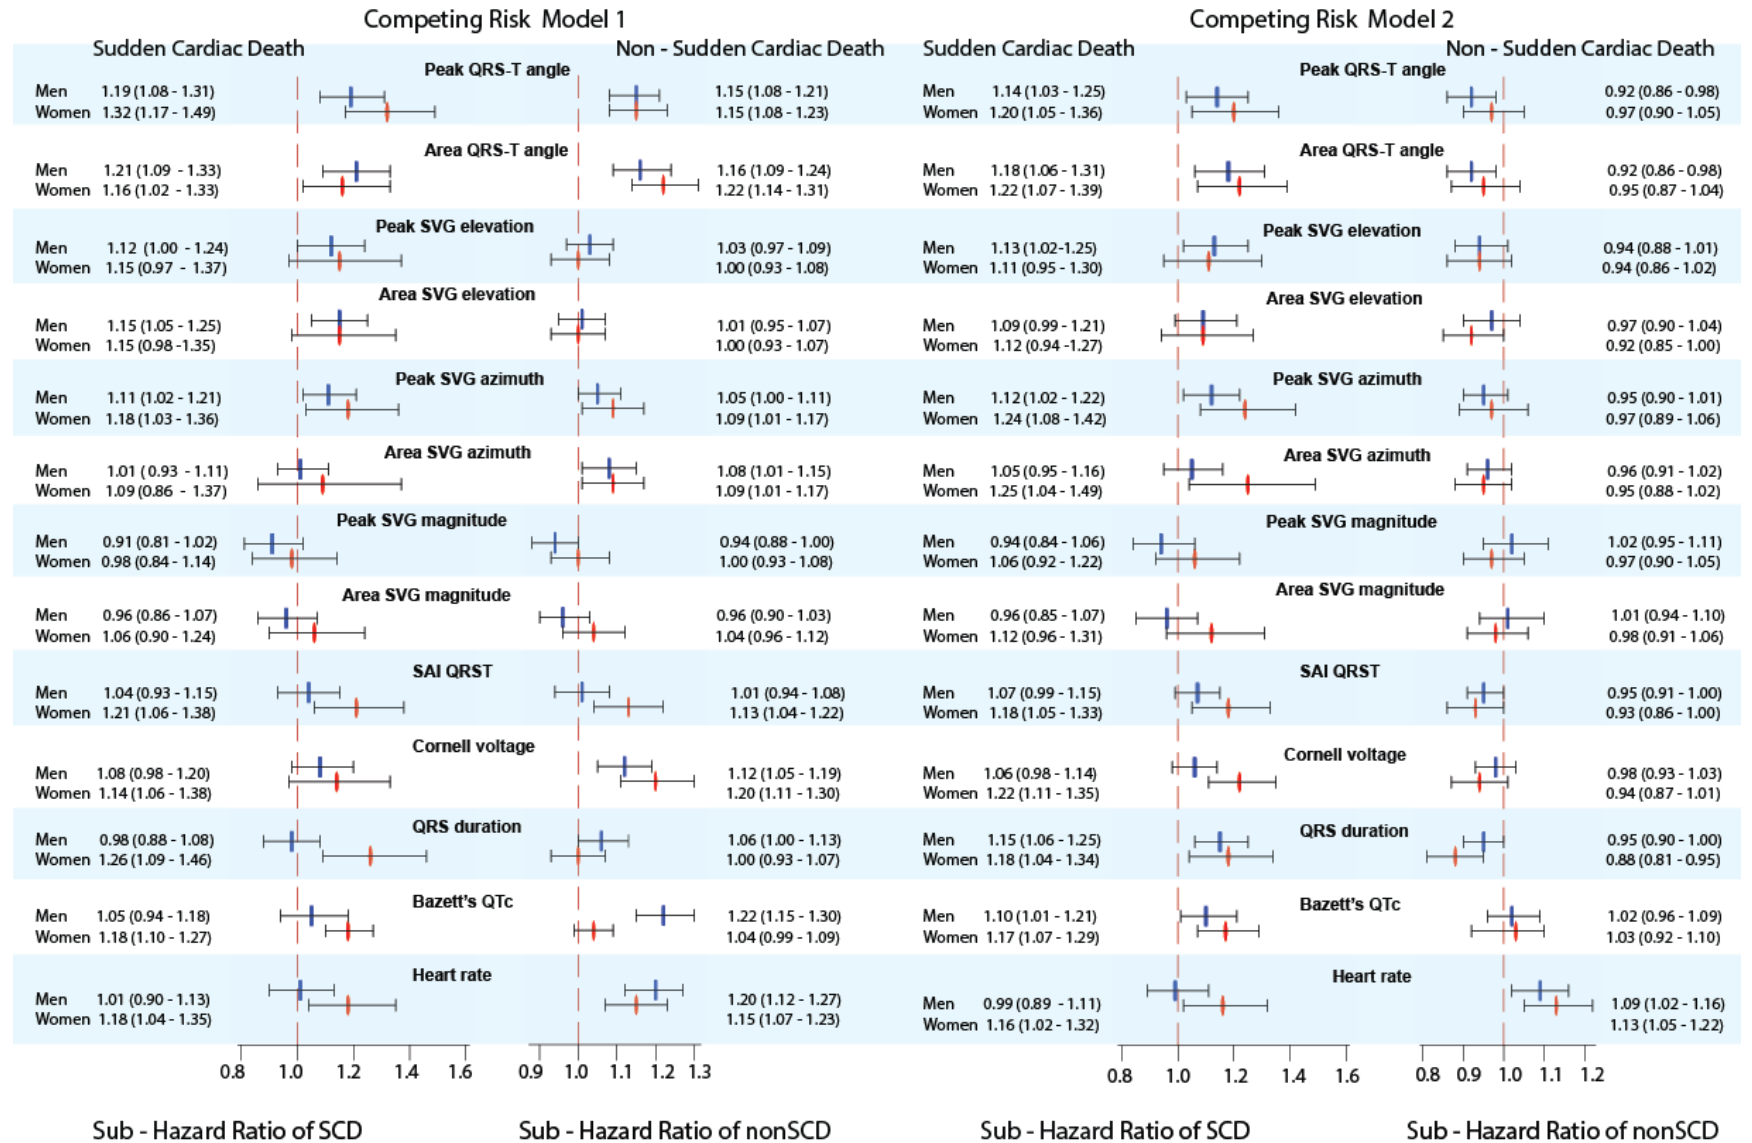

Figure 5:

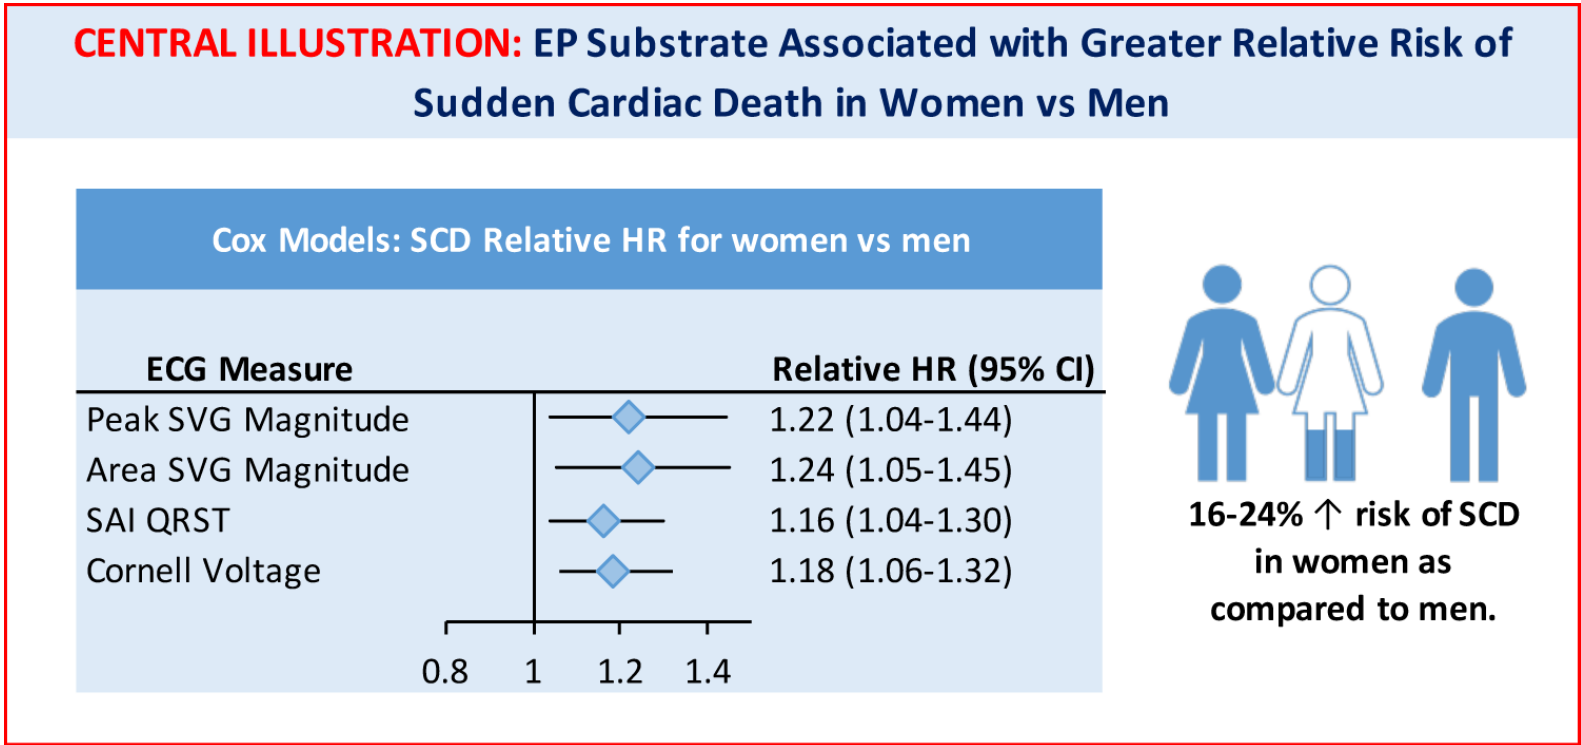

## SUPPLEMENTAL MATERIALS

### Supplemental Tables

*Supplemental Table 1. The positions of knots in the cubic spline models*

| ECG metric             | Men (n=6,601) |        |        |        | Women(n=8,124) |        |        |        |
|------------------------|---------------|--------|--------|--------|----------------|--------|--------|--------|
|                        | Knot #1       | Knot#2 | Knot#3 | Knot#4 | Knot #1        | Knot#2 | Knot#3 | Knot#4 |
| Peak QRS-T angle, °    | 12.5          | 33.4   | 53.2   | 138.0  | 8.9            | 25.6   | 40.7   | 110.2  |
| Area QRS-T angle, °    | 28.0          | 57.2   | 77.8   | 122.3  | 18.1           | 42.3   | 60.5   | 102.3  |
| Peak SVG elevation, °  | 41.7          | 61.4   | 71.5   | 92.3   | 38.3           | 55.8   | 65.7   | 82.4   |
| Area SVG elevation, °  | 44.1          | 62.3   | 74.5   | 104.9  | 42.5           | 58.6   | 69.7   | 93.2   |
| Peak SVG azimuth, °    | -55.7         | -11.4  | 1.8    | 69.8   | -19.6          | -1.6   | 9.6    | 42.3   |
| Area SVG azimuth, °    | -18.8         | 12.6   | 30.6   | 65.1   | -6.2           | 18.4   | 33.9   | 61.8   |
| SAI QRST, mV*ms        | 92.2          | 135.4  | 171.0  | 257.5  | 79.2           | 110.8  | 135.5  | 195.2  |
| Peak SVG magnitude, μV | 919           | 1432   | 1764   | 2404   | 957            | 1407   | 1723   | 2332   |
| SVG magnitude, μV      | 988           | 1517   | 1898   | 2676   | 1012           | 1484   | 1820   | 2473   |

**Supplemental Table 2A: Sex interaction in association of GEH with SCD in Cox models**

| Predictor, per 1 SD | All (n=14,725; 530 SCDs) |                        |                               |                               |                   |
|---------------------|--------------------------|------------------------|-------------------------------|-------------------------------|-------------------|
|                     | HR(95%CI)                | P-value                | RHR for women vs.men (95%CI)  | P <sub>interaction</sub>      |                   |
| Model 1             | Peak QRS-T angle         | <b>1.26(1.15-1.37)</b> | <b>&lt;0.0001</b>             | 1.10(0.97-1.26)               | 0.146             |
|                     | Area QRS-T angle         | <b>1.29(1.16-1.42)</b> | <b>&lt;0.0001</b>             | 0.98(0.84-1.15)               | 0.788             |
|                     | Peak SVG elevation       | <b>1.12(1.01-1.24)</b> | <b>0.031</b>                  | 1.03(0.87-1.23)               | 0.694             |
|                     | Area SVG elevation       | <b>1.15(1.04-1.26)</b> | <b>0.004</b>                  | 1.02(0.87-1.21)               | 0.781             |
|                     | Peak SVG azimuth         | <b>1.13(1.04-1.22)</b> | <b>0.003</b>                  | 1.05(0.90-1.23)               | 0.501             |
|                     | Area SVG azimuth         | 1.03(0.94-1.13)        | 0.479                         | 1.08(0.90-1.29)               | 0.423             |
|                     | Peak SVG magnitude       | <b>0.88(0.79-0.98)</b> | <b>0.023</b>                  | <b>1.19(1.004-1.42)</b>       | <b>0.044</b>      |
|                     | Area SVG magnitude       | 0.95(0.85-1.05)        | 0.311                         | <b>1.21(1.02-1.43)</b>        | <b>0.028</b>      |
|                     | SAI QRST                 | 1.04(0.95-1.14)        | 0.370 <sup>#</sup>            | <b>1.27(1.11-1.44)</b>        | <b>&lt;0.0001</b> |
|                     | Heart rate               | <b>1.12(1.01-1.25)</b> | <b>0.033</b>                  | 1.08(0.92-1.28)               | 0.335             |
|                     | Bazett's QTc             | 1.10(0.99-1.23)        | 0.087                         | 1.06(0.94-1.20)               | 0.352             |
|                     | QRS duration             | 0.99(0.90-1.10)        | 0.915                         | <b>1.24(1.07-1.44)</b>        | <b>0.004</b>      |
|                     | Cornell voltage          | <b>1.11(1.01-1.22)</b> | <b>0.033</b>                  | 1.17(0.99-1.38)               | 0.063             |
|                     | Model 2                  | Peak QRS-T angle       | <b>1.22(1.12-1.33)</b>        | <b>&lt;0.0001<sup>#</sup></b> | 1.10(0.96-1.26)   |
| Area QRS-T angle    |                          | <b>1.25(1.14-1.37)</b> | <b>&lt;0.0001<sup>#</sup></b> | 1.08(0.93-1.26)               | 0.287             |
| Peak SVG elevation  |                          | <b>1.13(1.02-1.24)</b> | <b>0.016</b>                  | 1.02(0.86-1.21)               | 0.804             |
| Area SVG elevation  |                          | 1.09(1.00-1.20)        | 0.062                         | 1.03(0.87-1.22)               | 0.738             |
| Peak SVG azimuth    |                          | <b>1.16(1.07-1.25)</b> | <b>&lt;0.0001<sup>#</sup></b> | 1.11(0.96-1.30)               | 0.167             |
| Area SVG azimuth    |                          | <b>1.11(1.01-1.21)</b> | <b>0.031<sup>#</sup></b>      | 1.18(0.98-1.41)               | 0.081             |
| Peak SVG magnitude  |                          | 0.92(0.83-1.03)        | 0.142                         | <b>1.22(1.04-1.44)</b>        | <b>0.018</b>      |
| Area SVG magnitude  |                          | 0.96(0.87-1.07)        | 0.452                         | <b>1.24(1.05-1.45)</b>        | <b>0.009</b>      |
| SAI QRST            |                          | <b>1.08(1.01-1.14)</b> | <b>0.019<sup>#</sup></b>      | <b>1.16(1.04-1.30)</b>        | <b>0.007</b>      |
| Heart rate          |                          | 1.10(1.00-1.22)        | 0.061                         | 1.13(0.97-1.32)               | 0.119             |
| Bazett's QTc        |                          | <b>1.15(1.05-1.25)</b> | <b>0.001</b>                  | 1.07(0.94-1.21)               | 0.305             |
| QRS duration        |                          | <b>1.20(1.11-1.29)</b> | <b>&lt;0.0001</b>             | 1.02(0.90-1.17)               | 0.728             |
| Cornell voltage     |                          | <b>1.08(1.00-1.16)</b> | <b>0.040</b>                  | <b>1.18(1.06-1.32)</b>        | <b>0.003</b>      |
| Model 3             |                          | Peak QRS-T angle       | <b>1.15(1.05-1.27)</b>        | <b>0.004</b>                  | 1.11(0.97-1.27)   |
|                     | Area QRS-T angle         | <b>1.16(1.05-1.29)</b> | <b>0.005</b>                  | 1.10(0.95-1.28)               | 0.204             |
|                     | Peak SVG elevation       | 1.04(0.94-1.15)        | 0.401                         | 1.01(0.86-1.19)               | 0.883             |
|                     | Area SVG elevation       | 1.03(0.94-1.14)        | 0.521                         | 1.02(0.87-1.20)               | 0.802             |
|                     | Peak SVG azimuth         | <b>1.10(1.02-1.20)</b> | <b>0.021</b>                  | 1.10(0.95-1.28)               | 0.205             |
|                     | Area SVG azimuth         | 1.08(0.98-1.16)        | 0.105                         | 1.15(0.97-1.35)               | 0.099             |
|                     | Peak SVG magnitud        | 0.94(0.84-1.05)        | 0.265                         | <b>1.20(1.02-1.41)</b>        | <b>0.029</b>      |
|                     | Area SVG magnitude       | 0.97(0.87-1.07)        | 0.513                         | <b>1.22(1.05-1.43)</b>        | <b>0.011</b>      |
|                     | SAI QRST                 | 1.02(0.94-1.10)        | 0.664                         | <b>1.14(1.02-1.27)</b>        | <b>0.020</b>      |

<sup>#</sup>Proportionality hazards assumption not met; SVG=spatial ventricular gradient; RHR=relative hazard ratio. Model 1 was adjusted for age, race and study center, prevalent HF, CHD, stroke, diabetes, hypertension, postmenopause state, education level, current smoking, alcohol intake, leisure physical activity level, BMI category, use of antihypertensive and antiarrhythmic medications, levels of total cholesterol, high density lipoprotein (HDL), and triglycerides, serum concentrations of sodium, potassium, calcium, magnesium, phosphorus, and uric acid, total protein and albumin, blood urea nitrogen, CKD stage classified by eGFR<sub>CKD-EPI</sub>, and sex-specific ECG-LVH. Models for Cornell voltage were not adjusted for ECG-LVH. Time-updated model 2 was adjusted for all baseline covariates included in model 1, and time-updated incident nonfatal CV events (AF, HF, CHD, and stroke). Time-updated ECG-adjusted model 3 was adjusted for all four time-updated traditional ECG measurements (heart rate, QTc, QRS, and Cornell voltage), in addition to baseline covariates, and time-updated incident nonfatal CV events included in model 2.

**Supplemental Table 2B: Association of GEH with SCD in Cox models for men and women**

| Predictor, per 1 SD | Men (n=6,601; 338 SCDs) |                         | Women (n=8,124; 192 SCDs)     |                               |                        |
|---------------------|-------------------------|-------------------------|-------------------------------|-------------------------------|------------------------|
|                     | HR(95%CI)               | P-value                 | HR(95%CI)                     | P-value                       |                        |
| Model 1             | Peak QRS-T angle        | <b>1.27(1.16-1.38)</b>  | <b>&lt;0.0001</b>             | <b>1.38(1.23-1.56)</b>        | <b>&lt;0.0001</b>      |
|                     | Area QRS-T angle        | <b>1.30(1.17-1.44)</b>  | <b>&lt;0.0001</b>             | <b>1.25(1.09-1.44)</b>        | <b>0.001</b>           |
|                     | Peak SVG elevation      | <b>1.13(1.02-1.26)</b>  | <b>0.018</b>                  | 1.11(0.95-1.30)               | 0.173                  |
|                     | Area SVG elevation      | <b>1.16(1.06-1.28)</b>  | <b>0.002</b>                  | 1.12(0.96-1.30)               | 0.156                  |
|                     | Peak SVG azimuth        | <b>1.14(1.05-1.23)</b>  | <b>0.002</b>                  | <b>1.19(1.03-1.38)</b>        | <b>0.019</b>           |
|                     | Area SVG azimuth        | 1.04(0.95-1.14)         | 0.404                         | 1.13(0.96-1.33)               | 0.153                  |
|                     | Peak SVG magnitude      | 0.90(0.81-1.01)         | 0.084                         | 1.00(0.86-1.16)               | 0.948                  |
|                     | Area SVG magnitude      | 0.97(0.87-1.08)         | 0.580                         | 1.10(0.94-1.28)               | 0.229                  |
|                     | SAI QRST                | 1.07(0.97-1.17)         | 0.168 <sup>#</sup>            | <b>1.32(1.17-1.49)</b>        | <b>&lt;0.0001</b>      |
|                     | Heart rate              | 1.11(1.00-1.24)         | 0.057                         | <b>1.25(1.10-1.43)</b>        | <b>0.001</b>           |
|                     | Bazett's QTc            | <b>1.13(1.01-1.27)</b>  | <b>0.034</b>                  | <b>1.18(1.09-1.26)</b>        | <b>&lt;0.0001</b>      |
|                     | QRS duration            | 0.99(0.89-1.10)         | 0.843                         | <b>1.24(1.08-1.42)</b>        | <b>0.002</b>           |
|                     | Cornell voltage         | <b>1.13(1.03-1.25)</b>  | <b>0.014</b>                  | <b>1.22(1.05-1.42)</b>        | <b>0.009</b>           |
|                     | Model 2                 | Peak QRS-T angle        | <b>1.26(1.15-1.37)</b>        | <b>&lt;0.0001<sup>#</sup></b> | <b>1.27(1.12-1.44)</b> |
| Area QRS-T angle    |                         | <b>1.28(1.16-1.41)</b>  | <b>&lt;0.0001<sup>#</sup></b> | <b>1.30(1.15-1.48)</b>        | <b>&lt;0.0001</b>      |
| Peak SVG elevation  |                         | <b>1.15(1.04-1.26)</b>  | <b>0.005</b>                  | 1.09(0.95-1.26)               | 0.215                  |
| Area SVG elevation  |                         | <b>1.11(1.01-1.23)</b>  | <b>0.026</b>                  | 1.06(0.92-1.23)               | 0.426                  |
| Peak SVG azimuth    |                         | <b>1.17(1.08-1.26)</b>  | <b>&lt;0.0001<sup>#</sup></b> | <b>1.26(1.10-1.46)</b>        | <b>0.001</b>           |
| Area SVG azimuth    |                         | <b>1.11(1.01-1.22)</b>  | <b>0.024<sup>#</sup></b>      | <b>1.28(1.09-1.50)</b>        | <b>0.002</b>           |
| Peak SVG magnitude  |                         | 0.93(0.83-1.04)         | 0.193                         | 1.07(0.93-1.23)               | 0.355                  |
| Area SVG magnitude  |                         | 0.97(0.87-1.08)         | 0.590                         | 1.14(0.98-1.31)               | 0.080                  |
| SAI QRST            |                         | <b>1.09(1.03-1.16)</b>  | <b>0.005</b>                  | <b>1.19(1.07-1.32)</b>        | <b>0.001</b>           |
| Heart rate          |                         | 1.11(1.00-1.23)         | 0.057                         | <b>1.26(1.11-1.41)</b>        | <b>&lt;0.0001</b>      |
| Bazett's QTc        |                         | <b>1.17(1.08-1.27)</b>  | <b>&lt;0.0001</b>             | <b>1.19(1.08-1.31)</b>        | <b>0.001</b>           |
| QRS duration        |                         | <b>1.21(1.12-1.31)</b>  | <b>&lt;0.0001</b>             | <b>1.16(1.04-1.30)</b>        | <b>0.010</b>           |
| Cornell voltage     |                         | <b>1.10(1.02-1.18)</b>  | <b>0.012<sup>#</sup></b>      | <b>1.24(1.13-1.37)</b>        | <b>&lt;0.0001</b>      |
| Model 3             |                         | Peak QRS-T angle        | <b>1.20(1.09-1.33)</b>        | <b>&lt;0.0001</b>             | <b>1.17(1.02-1.34)</b> |
|                     | Area QRS-T angle        | <b>1.22(1.09-1.37)</b>  | <b>&lt;0.0001</b>             | <b>1.18(1.02-1.37)</b>        | <b>0.025</b>           |
|                     | Peak SVG elevation      | 1.08(0.98-1.20)         | 0.136                         | 0.96(0.82-1.12)               | 0.595                  |
|                     | Area SVG elevation      | 1.06(0.96-1.17)         | 0.240                         | 0.98(0.84-1.15)               | 0.823                  |
|                     | Peak SVG azimuth        | <b>1.13(1.04-1.23)</b>  | <b>0.005</b>                  | <b>1.16(0.99-1.36)</b>        | <b>0.062</b>           |
|                     | Area SVG azimuth        | <b>1.10(1.003-1.21)</b> | <b>0.042</b>                  | <b>1.19(1.02-1.40)</b>        | <b>0.030</b>           |
|                     | Peak SVG magnitude      | 1.02(0.94-1.12)         | 0.599                         | <b>1.16(1.001-1.35)</b>       | <b>0.049</b>           |
|                     | Area SVG magnitude      | 0.95(0.84-1.06)         | 0.354                         | 1.04(0.91-1.20)               | 0.544                  |
| SAI QRST            | 0.97(0.87-1.09)         | 0.646                   | 1.13(0.98-1.30)               | 0.100                         |                        |



*Supplemental Table 3A. Sex interaction in association of GEH with SCD and nonSCD in competing risk models*

| Predictor, per 1 SD | SCD (n=14,725; 530 SCDs) |                   |                                |                          | nonSCD (n=14,725; 2,178 nonSCDs) |                   |                                |                          |
|---------------------|--------------------------|-------------------|--------------------------------|--------------------------|----------------------------------|-------------------|--------------------------------|--------------------------|
|                     | SHR(95% CI)              | P-value           | RSHR for women vs.men (95% CI) | P <sub>interaction</sub> | SHR(95% CI)                      | P-value           | RSHR for women vs.men (95% CI) | P <sub>interaction</sub> |
| Model 1             |                          |                   |                                |                          |                                  |                   |                                |                          |
| Peak QRS-T angle    | <b>1.17(1.07-1.28)</b>   | <b>&lt;0.0001</b> | <b>1.12(0.98-1.28)</b>         | <b>0.084</b>             | <b>1.12(1.06-1.19)</b>           | <b>&lt;0.0001</b> | 1.12(0.97-1.14)                | 0.207                    |
| Area QRS-T angle    | <b>1.19(1.08-1.31)</b>   | <b>&lt;0.0001</b> | 0.98(0.85-1.14)                | 0.840                    | <b>1.15(1.08-1.22)</b>           | <b>&lt;0.0001</b> | 1.07(0.98-1.18)                | 0.120                    |
| Peak SVG elevation  | 1.10(0.99-1.22)          | 0.084             | 1.07(0.90-1.28)                | 0.445                    | 1.03(0.97-1.10)                  | 0.339             | 0.97(0.88-1.06)                | 0.474                    |
| Area SVG elevation  | <b>1.13(1.03-1.23)</b>   | <b>0.011</b>      | 1.06(0.90-1.26)                | 0.484                    | 1.01(0.95-1.07)                  | 0.752             | 0.99(0.91-1.08)                | 0.784                    |
| Peak SVG azimuth    | <b>1.10(1.02-1.20)</b>   | <b>0.020</b>      | 1.07(0.92-1.24)                | 0.408                    | 1.04(0.99-1.10)                  | 0.115             | 1.06(0.98-1.16)                | 0.144                    |
| Area SVG azimuth    | 1.01(0.92-1.10)          | 0.884             | 1.07(0.86-1.32)                | 0.557                    | <b>1.07(1.01-1.14)</b>           | <b>0.022</b>      | 1.03(0.94-1.13)                | 0.533                    |
| Peak SVG magnitude  | <b>0.89(0.79-0.99)</b>   | <b>0.040</b>      | <b>1.16(0.98-1.36)</b>         | <b>0.083</b>             | <b>0.92(0.86-0.99)</b>           | <b>0.019</b>      | <b>1.11(1.01-1.22)</b>         | <b>0.027</b>             |
| Area SVG magnitude  | 0.94(0.84-1.05)          | 0.250             | <b>1.16(0.99-1.37)</b>         | <b>0.063</b>             | 0.94(0.88-1.00)                  | 0.061             | <b>1.15(1.05-1.26)</b>         | <b>0.003</b>             |
| SAI QRST            | 1.03(0.93-1.13)          | 0.604             | <b>1.16(1.01-1.33)</b>         | <b>0.033</b>             | 0.99(0.93-1.06)                  | 0.728             | <b>1.16(1.06-1.27)</b>         | <b>0.002</b>             |
| Heart rate.         | 1.01(0.91-1.12)          | 0.914             | <b>1.16(0.97-1.37)</b>         | <b>0.087</b>             | <b>1.18(1.11-1.26)</b>           | <b>&lt;0.0001</b> | 0.98(0.89-1.07)                | 0.624                    |
| Bazett's QTc        | 1.02(0.92-1.14)          | 0.697             | <b>1.15(1.02-1.30)</b>         | <b>0.025</b>             | <b>1.20(1.12-1.28)</b>           | <b>&lt;0.0001</b> | <b>0.87(0.81-0.94)</b>         | <b>0.001</b>             |
| QRS duration        | 0.98(0.89-1.08)          | 0.695             | <b>1.27(1.08-1.49)</b>         | <b>0.004</b>             | 1.05(0.99-1.12)                  | 0.079             | 0.95(0.88-1.03)                | 0.197                    |
| Cornell voltage     | 1.06(0.96-1.16)          | 0.249             | 1.14(0.97-1.34)                | 0.112                    | <b>1.10(1.03-1.17)</b>           | <b>0.003</b>      | <b>1.11(1.01-1.22)</b>         | <b>0.032</b>             |
| Model 2             |                          |                   |                                |                          |                                  |                   |                                |                          |
| Peak QRS-T angle    | <b>1.10(1.01-1.21)</b>   | <b>0.039</b>      | <b>1.13(0.98-1.31)</b>         | <b>0.081</b>             | <b>0.90(0.85-0.96)</b>           | <b>0.001</b>      | <b>1.10(1.004-1.20)</b>        | <b>0.040</b>             |
| Area QRS-T angle    | <b>1.15(1.03-1.27)</b>   | <b>0.007</b>      | 1.09(0.93-1.27)                | 0.296                    | <b>0.90(0.85-0.96)</b>           | <b>0.001</b>      | 1.09(0.99-1.20)                | 0.078                    |
| Peak SVG elevation  | 1.10(1.00-1.22)          | 0.061             | 1.06(0.89-1.27)                | 0.480                    | 0.94(0.88-1.01)                  | 0.082             | 0.99(0.89-1.10)                | 0.833                    |
| Area SVG elevation  | 1.07(0.97-1.18)          | 0.189             | 1.10(0.93-1.30)                | 0.283                    | 0.97(0.90-1.04)                  | 0.353             | 0.95(0.86-1.06)                | 0.366                    |
| Peak SVG azimuth    | <b>1.09(1.002-1.19)</b>  | <b>0.044</b>      | <b>1.16(0.99-1.35)</b>         | <b>0.065</b>             | <b>0.94(0.89-0.99)</b>           | <b>0.026</b>      | 1.05(0.95-1.15)                | 0.379                    |
| Area SVG azimuth    | 1.03(0.94-1.14)          | 0.506             | <b>1.21(0.99-1.48)</b>         | <b>0.063</b>             | 0.95(0.90-1.01)                  | 0.083             | 1.02(0.93-1.12)                | 0.605                    |
| Peak SVG magnitude  | 0.94(0.84-1.05)          | 0.277             | <b>1.18(1.00-1.39)</b>         | <b>0.057</b>             | 1.02(0.95-1.10)                  | 0.605             | 0.97(0.87-1.07)                | 0.524                    |
| Area SVG magnitude  | 0.95(0.85-1.06)          | 0.341             | <b>1.21(1.03-1.43)</b>         | <b>0.021</b>             | 1.00(0.93-1.08)                  | 0.904             | 1.00(0.90-1.10)                | 0.933                    |
| SAI QRST            | 1.05(0.97-1.13)          | 0.205             | <b>1.16(1.02-1.31)</b>         | <b>0.025</b>             | <b>0.94(0.89-0.99)</b>           | <b>0.019</b>      | 1.01(0.93-1.10)                | 0.810                    |
| Heart rate.         | 0.98(0.88-1.09)          | 0.714             | <b>1.19(1.01-1.40)</b>         | <b>0.036</b>             | <b>1.08(1.01-1.15)</b>           | <b>0.032</b>      | 1.06(0.96-1.17)                | 0.230                    |
| Bazett's QTc        | 1.07(0.98-1.17)          | 0.124             | <b>1.11(0.99-1.26)</b>         | <b>0.086</b>             | 1.01(0.95-1.07)                  | 0.714             | 1.02(0.94-1.12)                | 0.619                    |
| QRS duration        | 1.13(1.04-1.23)          | 0.002             | 1.10(0.96-1.27)                | 0.176                    | <b>0.94(0.89-0.99)</b>           | <b>0.032</b>      | 0.94(0.85-1.03)                | 0.154                    |
| Cornell voltage     | 1.03(0.95-1.11)          | 0.442             | <b>1.23(1.10-1.38)</b>         | <b>&lt;0.0001</b>        | 0.97(0.93-1.02)                  | 0.271             | 0.97(0.90-1.06)                | 0.525                    |

RSHR=relative sub-hazard ratio

**Supplemental Table 3B. Competing risks of sudden cardiac death and non-sudden cardiovascular death for men and women**

| Predictor, per 1 SD | Sudden cardiac death    |                         |                           |                        | Non-sudden cardiac death   |                        |                                |                        |                   |       |
|---------------------|-------------------------|-------------------------|---------------------------|------------------------|----------------------------|------------------------|--------------------------------|------------------------|-------------------|-------|
|                     | Men (n=6,601; 338 SCDs) |                         | Women (n=8,124; 192 SCDs) |                        | Men (n=6,601; 1126 nonSCD) |                        | Women (n=8,124; 1,052 nonSCDs) |                        |                   |       |
|                     | SHR(95%CI)              | P-value                 | SHR(95%CI)                | P-value                | SHR(95%CI)                 | P-value                | SHR(95%CI)                     | P-value                |                   |       |
| Model 1             | Peak QRS-T angle        | <b>1.19(1.08-1.31)</b>  | <b>&lt;0.0001</b>         | <b>1.32(1.17-1.49)</b> | <b>&lt;0.0001</b>          | <b>1.15(1.08-1.21)</b> | <b>&lt;0.0001</b>              | <b>1.15(1.08-1.23)</b> | <b>&lt;0.0001</b> |       |
|                     | Area QRS-T angle        | <b>1.21(1.09-1.33)</b>  | <b>&lt;0.0001</b>         | <b>1.16(1.02-1.33)</b> | <b>0.026</b>               | <b>1.16(1.09-1.24)</b> | <b>&lt;0.0001</b>              | <b>1.22(1.14-1.31)</b> | <b>&lt;0.0001</b> |       |
|                     | Peak SVG elevation      | <b>1.12(1.004-1.24)</b> | <b>0.041</b>              | 1.15(0.97-1.37)        | 0.107                      | 1.03(0.97-1.09)        | 0.361                          | 1.00(0.93-1.08)        | 0.946             |       |
|                     | Area SVG elevation      | <b>1.15(1.05-1.25)</b>  | <b>0.004</b>              | 1.15(0.98-1.35)        | 0.093                      | 1.01(0.95-1.07)        | 0.736                          | 1.00(0.93-1.07)        | 0.927             |       |
|                     | Peak SVG azimuth        | <b>1.11(1.02-1.21)</b>  | <b>0.011</b>              | <b>1.18(1.03-1.36)</b> | <b>0.020</b>               | <b>1.05(1.00-1.11)</b> | <b>0.046</b>                   | <b>1.09(1.01-1.17)</b> | <b>0.021</b>      |       |
|                     | Area SVG azimuth        | 1.01(0.93-1.11)         | 0.747                     | 1.09(0.86-1.37)        | 0.473                      | <b>1.08(1.01-1.15)</b> | <b>0.017</b>                   | <b>1.09(1.01-1.17)</b> | <b>0.023</b>      |       |
|                     | Peak SVG magnitude      | 0.91(0.81-1.02)         | 0.110                     | 0.98(0.84-1.14)        | 0.774                      | 0.94(0.88-1.005)       | 0.068                          | 1.00(0.93-1.08)        | 0.960             |       |
|                     | Area SVG magnitude      | 0.96(0.86-1.07)         | 0.484                     | 1.06(0.90-1.24)        | 0.483                      | 0.96(0.90-1.03)        | 0.218                          | 1.04(0.96-1.12)        | 0.308             |       |
|                     | SAI QRST                | 1.04(0.93-1.15)         | 0.495                     | <b>1.21(1.06-1.38)</b> | <b>0.004</b>               | 1.01(0.94-1.08)        | 0.832                          | <b>1.13(1.04-1.22)</b> | <b>0.004</b>      |       |
|                     | Heart rate.             | 1.01(0.90-1.13)         | 0.895                     | <b>1.18(1.04-1.35)</b> | <b>0.012</b>               | <b>1.20(1.12-1.27)</b> | <b>&lt;0.0001</b>              | <b>1.15(1.07-1.23)</b> | <b>&lt;0.0001</b> |       |
|                     | Bazett's QTc            | 1.05(0.94-1.18)         | 0.408                     | <b>1.18(1.10-1.27)</b> | <b>&lt;0.0001</b>          | <b>1.22(1.15-1.30)</b> | <b>&lt;0.0001</b>              | 1.04(0.99-1.09)        | 0.121             |       |
|                     | QRS duration            | 0.98(0.88-1.08)         | 0.663                     | <b>1.26(1.09-1.46)</b> | <b>0.002</b>               | 1.06(1.00-1.13)        | 0.058                          | 1.00(0.93-1.07)        | 0.934             |       |
|                     | Cornell voltage         | 1.08(0.98-1.20)         | 0.101                     | 1.14(0.97-1.33)        | 0.109                      | <b>1.12(1.05-1.19)</b> | <b>&lt;0.0001</b>              | <b>1.20(1.11-1.30)</b> | <b>&lt;0.0001</b> |       |
|                     | Model 2                 | Peak QRS-T angle        | <b>1.14(1.03-1.25)</b>    | <b>0.008</b>           | <b>1.20(1.05-1.36)</b>     | <b>0.005</b>           | <b>0.92(0.86-0.98)</b>         | <b>0.011</b>           | 0.97(0.90-1.05)   | 0.476 |
|                     |                         | Area QRS-T angle        | <b>1.18(1.06-1.31)</b>    | <b>0.002</b>           | <b>1.22(1.07-1.39)</b>     | <b>0.003</b>           | <b>0.92(0.86-0.98)</b>         | <b>0.011</b>           | 0.95(0.87-1.04)   | 0.284 |
| Peak SVG elevation  |                         | <b>1.13(1.02-1.25)</b>  | <b>0.020</b>              | 1.11(0.95-1.30)        | 0.190                      | 0.94(0.88-1.01)        | 0.085                          | 0.94(0.86-1.02)        | 0.119             |       |
| Area SVG elevation  |                         | 1.09(0.99-1.21)         | 0.071                     | 1.09(0.94-1.27)        | 0.269                      | 0.97(0.90-1.04)        | 0.340                          | <b>0.92(0.85-1.00)</b> | <b>0.053</b>      |       |
| Peak SVG azimuth    |                         | <b>1.12(1.02-1.22)</b>  | <b>0.012</b>              | <b>1.24(1.08-1.42)</b> | <b>0.003</b>               | 0.95(0.90-1.01)        | 0.087                          | 0.97(0.89-1.06)        | 0.484             |       |
| Area SVG azimuth    |                         | 1.05(0.95-1.16)         | 0.349                     | <b>1.25(1.04-1.49)</b> | <b>0.016</b>               | 0.96(0.91-1.02)        | 0.165                          | 0.95(0.88-1.02)        | 0.178             |       |
| Peak SVG magnitude  |                         | 0.94(0.84-1.06)         | 0.337                     | 1.06(0.92-1.22)        | 0.433                      | 1.02(0.95-1.11)        | 0.549                          | 0.97(0.90-1.05)        | 0.460             |       |
| Area SVG magnitude  |                         | 0.96(0.85-1.07)         | 0.428                     | 1.12(0.96-1.31)        | 0.148                      | 1.01(0.94-1.10)        | 0.711                          | 0.98(0.91-1.06)        | 0.653             |       |
| SAI QRST            |                         | 1.07(0.99-1.15)         | 0.073                     | <b>1.18(1.05-1.33)</b> | <b>0.009</b>               | <b>0.95(0.91-1.00)</b> | <b>0.060</b>                   | <b>0.93(0.86-1.00)</b> | <b>0.054</b>      |       |
| Heart rate.         |                         | 0.99(0.89-1.11)         | 0.911                     | <b>1.16(1.02-1.32)</b> | <b>0.026</b>               | <b>1.09(1.02-1.16)</b> | <b>0.012</b>                   | <b>1.13(1.05-1.22)</b> | <b>0.001</b>      |       |
| Bazett's QTc        |                         | <b>1.10(1.01-1.21)</b>  | <b>0.033</b>              | <b>1.17(1.07-1.29)</b> | <b>0.001</b>               | 1.02(0.96-1.09)        | 0.449                          | 1.03(0.92-1.10)        | 0.397             |       |
| QRS duration        |                         | <b>1.15(1.06-1.25)</b>  | <b>&lt;0.0001</b>         | <b>1.18(1.04-1.34)</b> | <b>0.011</b>               | <b>0.95(0.90-1.00)</b> | <b>0.070</b>                   | <b>0.88(0.81-0.95)</b> | <b>0.001</b>      |       |
| Cornell voltage     |                         | 1.06(0.98-1.14)         | 0.177                     | <b>1.22(1.11-1.35)</b> | <b>&lt;0.0001</b>          | 0.98(0.93-1.03)        | 0.420                          | 0.94(0.87-1.01)        | 0.093             |       |

## Supplemental Figure Legends

**Supplemental Figure 1.** Estimated adjusted marginal (least-squares) means and 95% Confidence Intervals of GEH variables for men and women. **Model 1** was adjusted for age, race, and study center. **Model 2** was in addition adjusted for prevalent HF, CHD, stroke, diabetes, hypertension, BMI, postmenopause state, education level, current smoking, current alcohol intake, leisure physical activity level, BMI category, use of antihypertensive and antiarrhythmic medications, levels of total cholesterol, HDL, and triglycerides, serum concentrations of sodium, potassium, calcium, magnesium, phosphorus, and uric acid, total protein and albumin, blood urea nitrogen, CKD stage classified by  $eGFR_{CKD-EPI}$ , mean heart rate, QRS duration, QTc, Cornell voltage, and sex-specific ECG – LVH.

**Supplemental Figure 2.** Adjusted (for age, race, study center, prevalent at baseline HF, CHD, stroke, diabetes, hypertension, BMI, postmenopause state, education level, current smoking, current alcohol intake, leisure physical activity level, BMI category, use of antihypertensive and antiarrhythmic medications, levels of total cholesterol, HDL, and triglycerides, serum concentrations of sodium, potassium, calcium, magnesium, phosphorus, and uric acid, total protein and albumin, blood urea nitrogen, CKD stage classified by  $eGFR_{CKD-EPI}$ , mean heart rate, QRS duration, QTc, Cornell voltage, and sex-specific ECG – LVH.) risk of SCD associated with GEH variables in men and women. Restricted cubic spline with 95% CI shows change in hazard ratio (Y-axis) in response to GEH variable change (X-axis). 50<sup>th</sup> percentile of GEH variable is selected as reference.

**Figure 1A: Spatial peak QRS-T angle in men and women:**

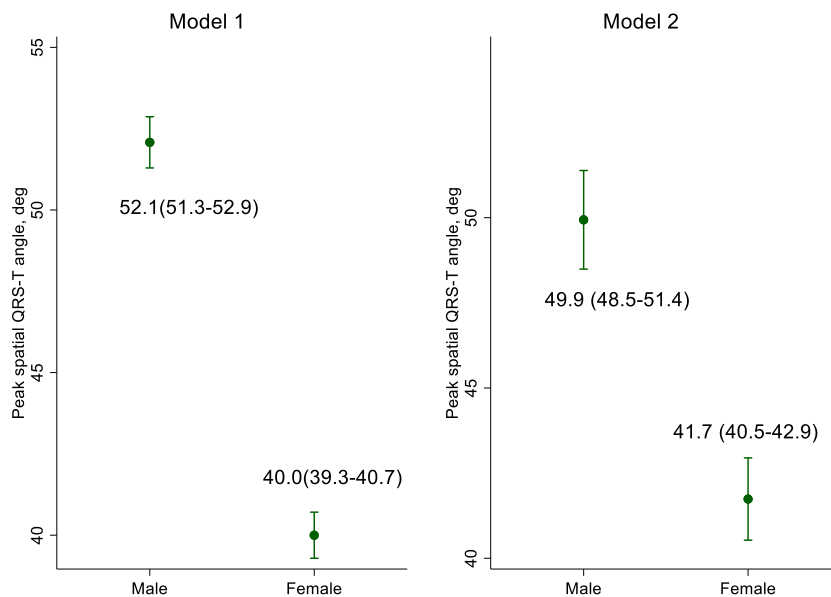

**Figure 1B: Spatial area QRS-T angle in men and women:**

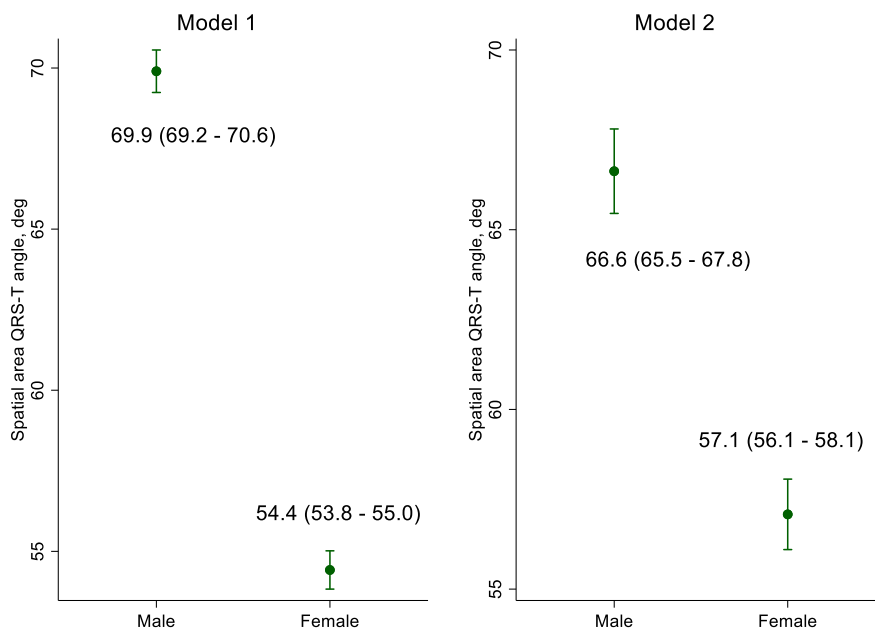

**Figure 1C: Spatial peak SVG elevation in men and women:**

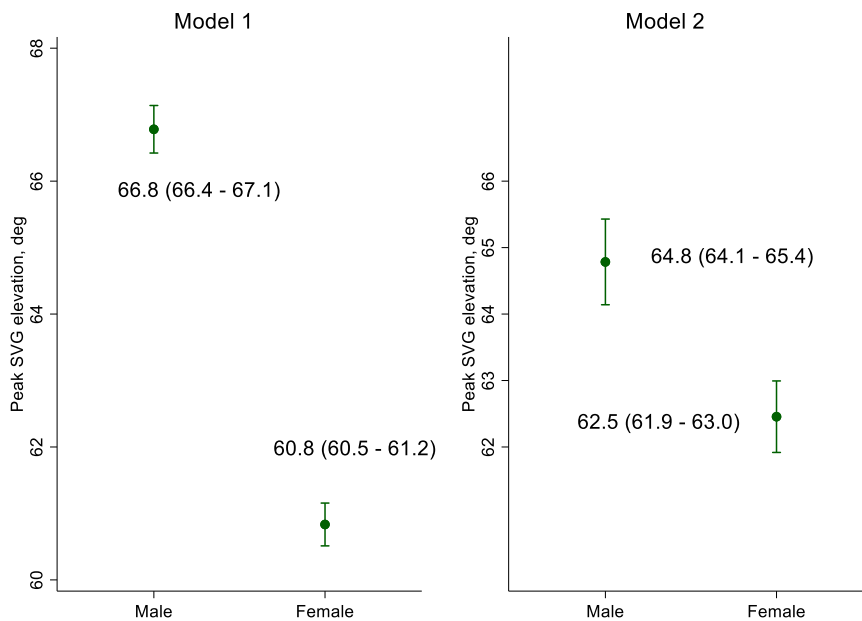

**Figure 1D: Spatial area SVG elevation in men and women:**

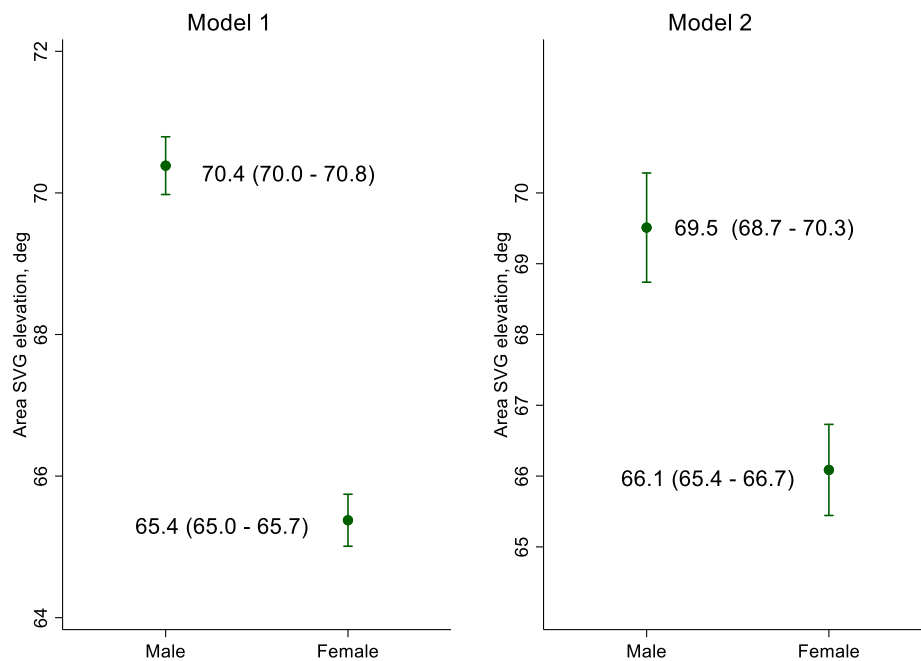

**Figure 1E: Spatial peak SVG azimuth in men and women:**

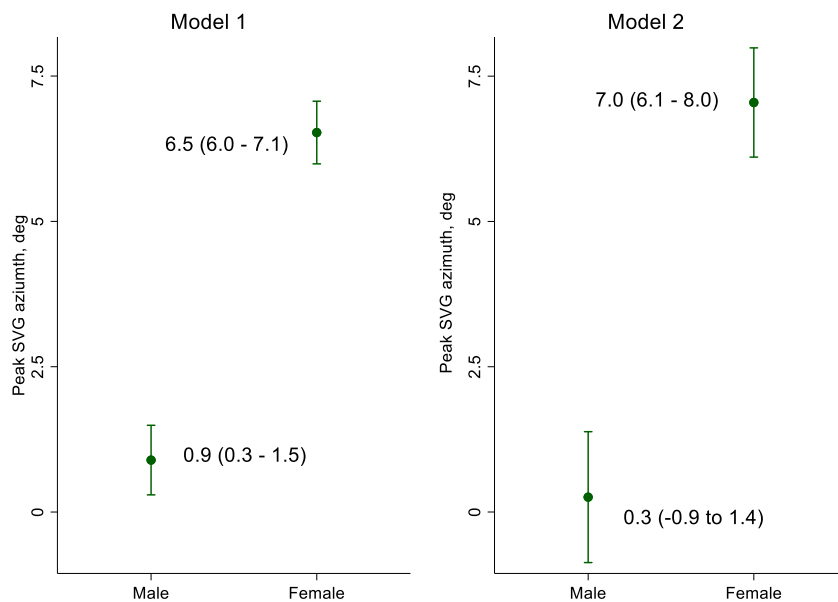

**Figure 1F: Spatial area SVG azimuth in men and women:**

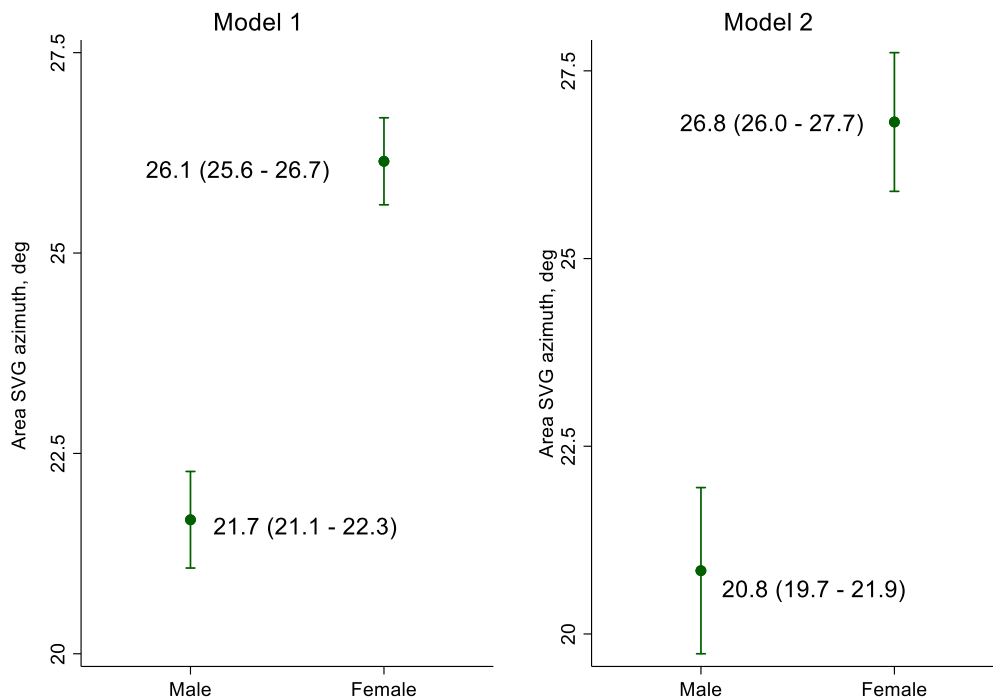

**Figure 1G: Spatial peak SVG magnitude in men and women:**

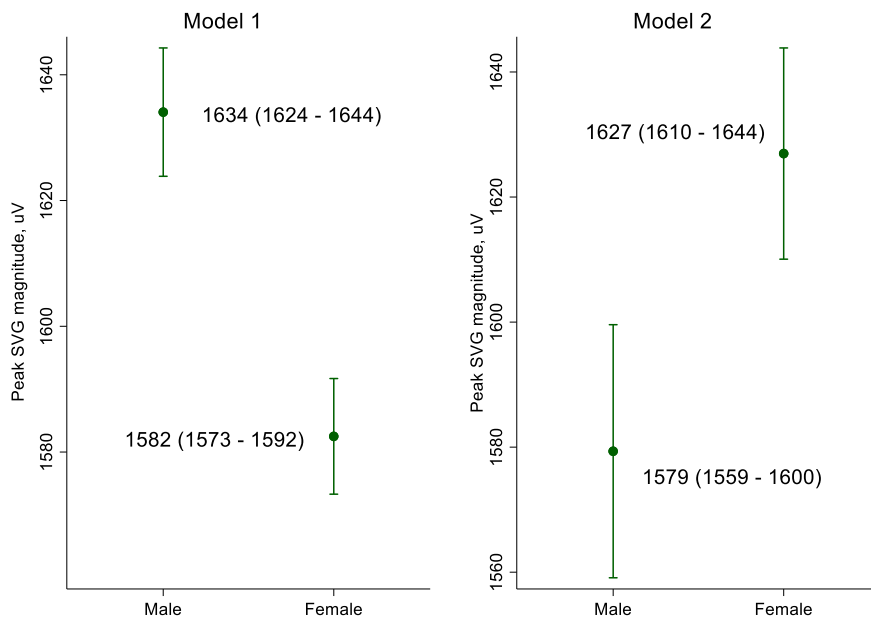

**Figure 1H: Spatial SVG magnitude in men and women:**

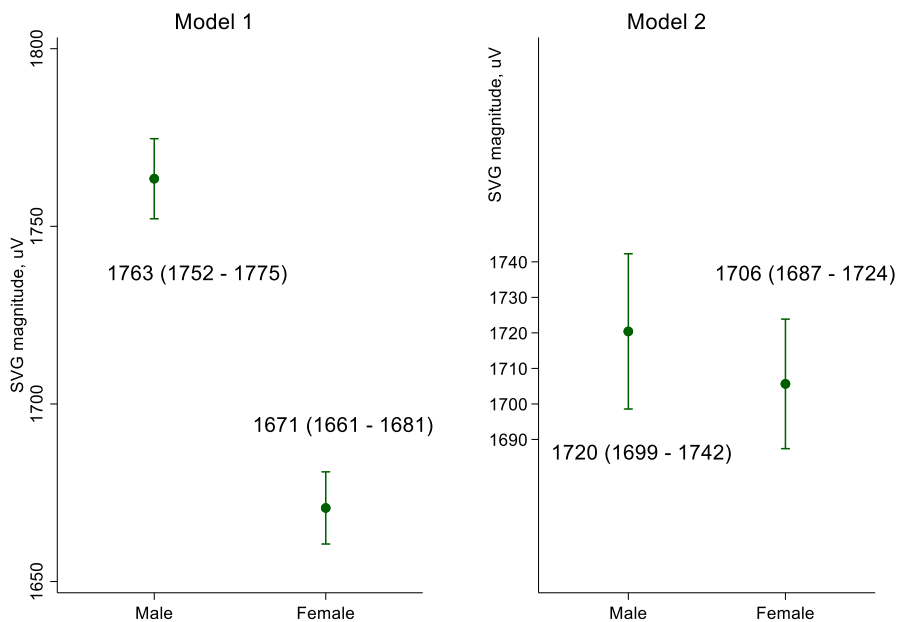

**Figure II: SAI QRST in men and women:**

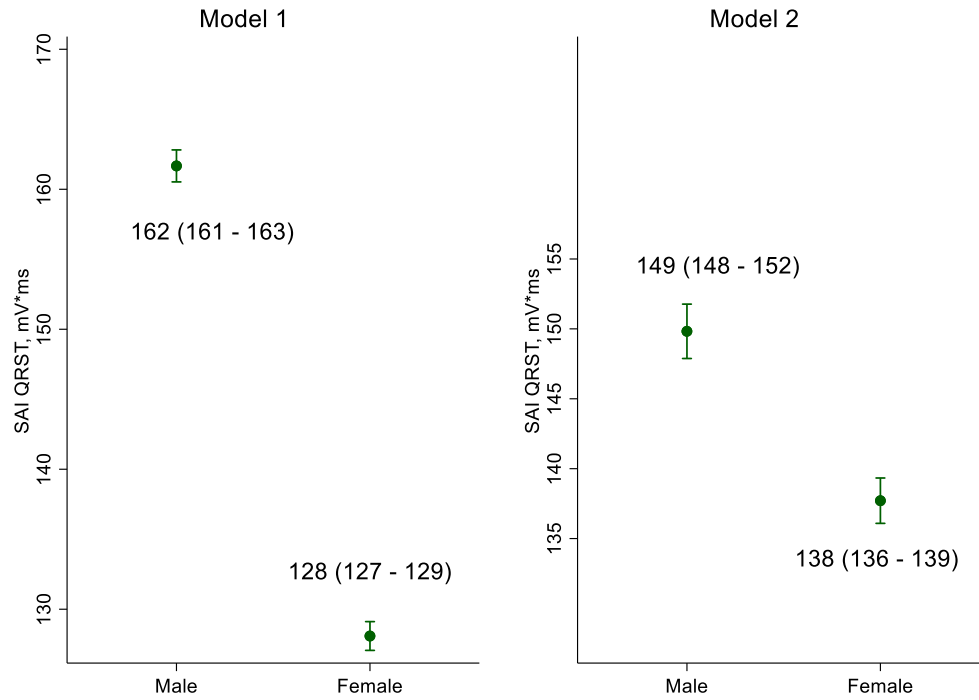



**Figure 2A: Adjusted risk of SCD associated with peak QRS-T angle**

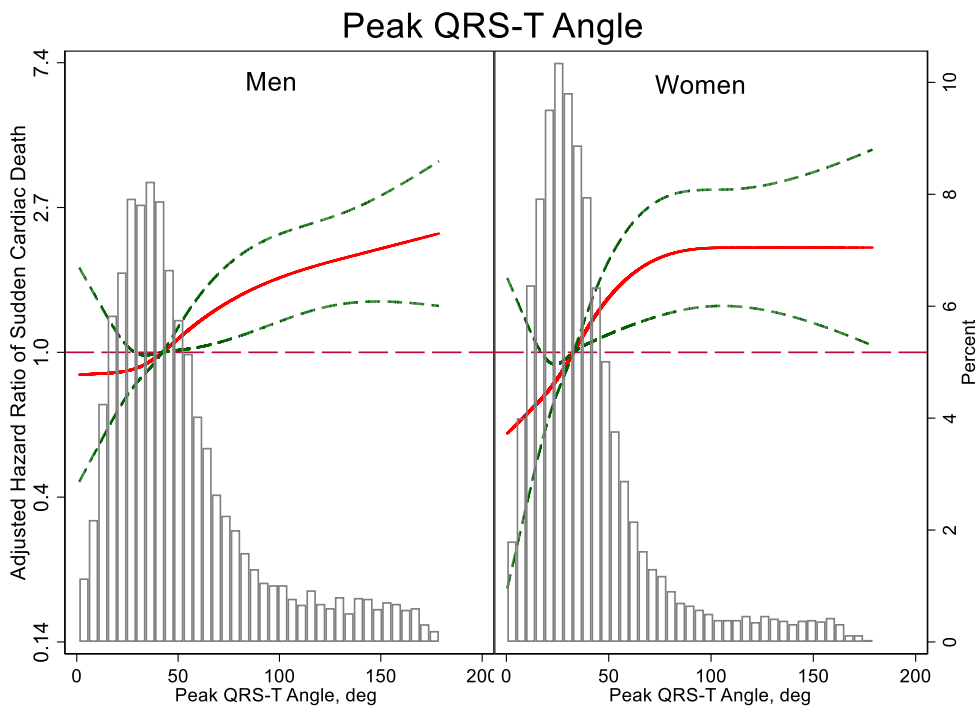

**Figure 2B: Adjusted risk of SCD associated with area QRS-T angle**

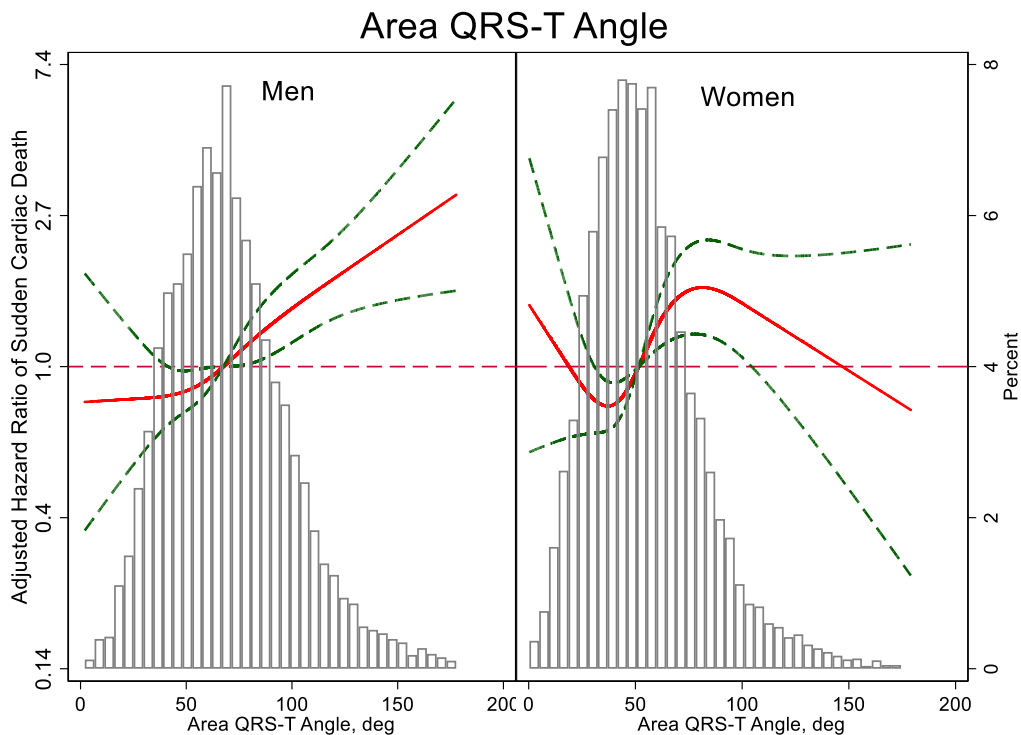

**Figure 2C: Adjusted risk of SCD associated with peak SVG elevation**

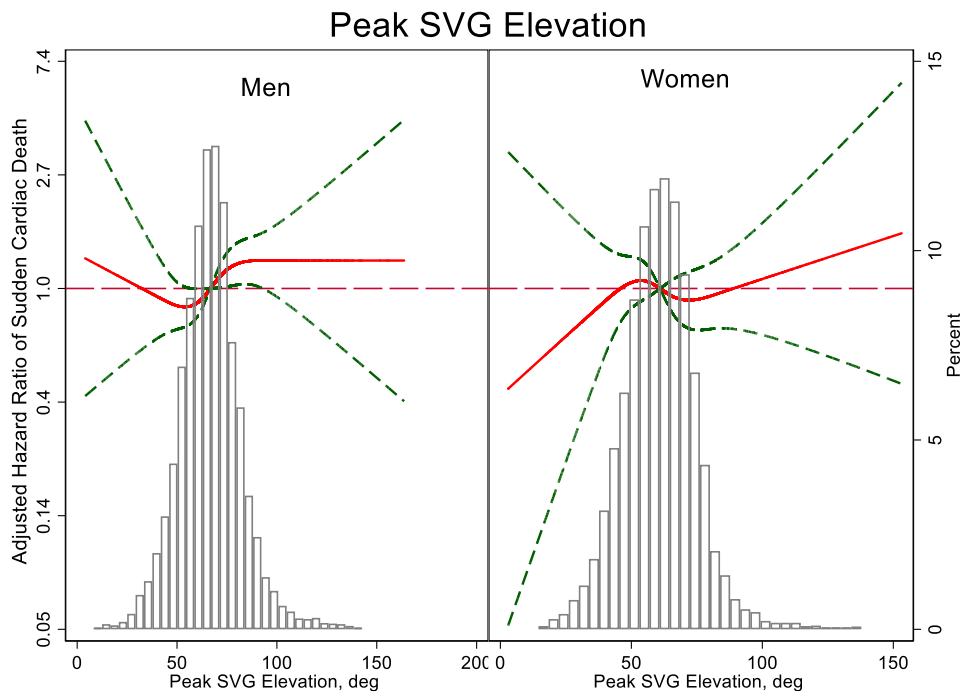

**Figure 2D: Adjusted risk of SCD associated with area SVG elevation**

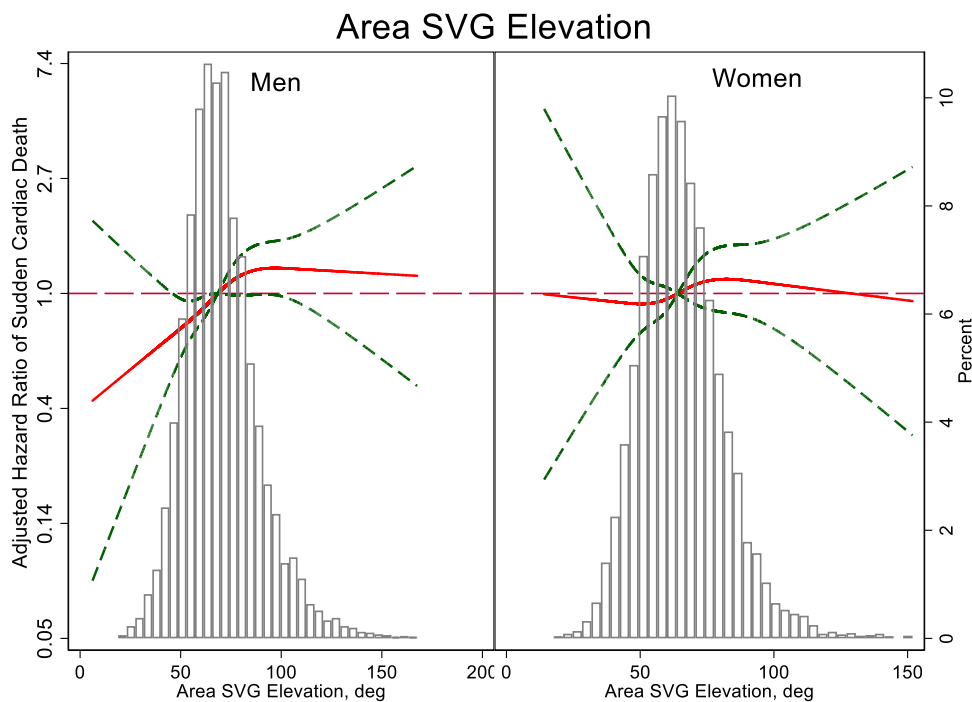

**Figure 2E: Adjusted risk of SCD associated with peak SVG azimuth**

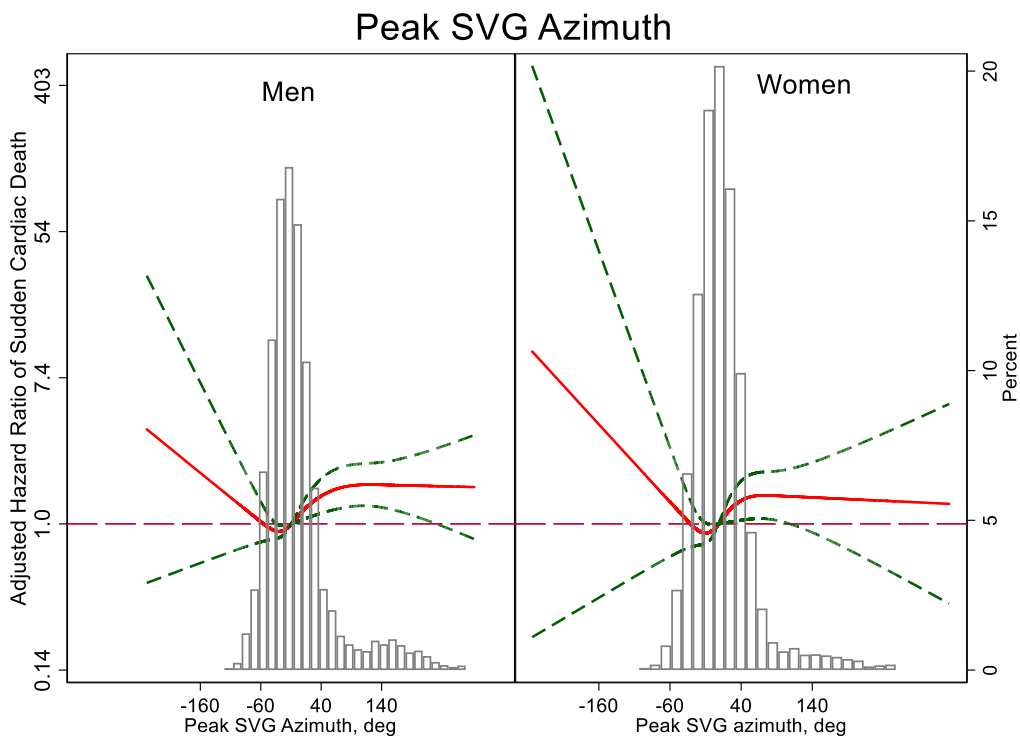

**Figure 2F: Adjusted risk of SCD associated with area SVG azimuth**

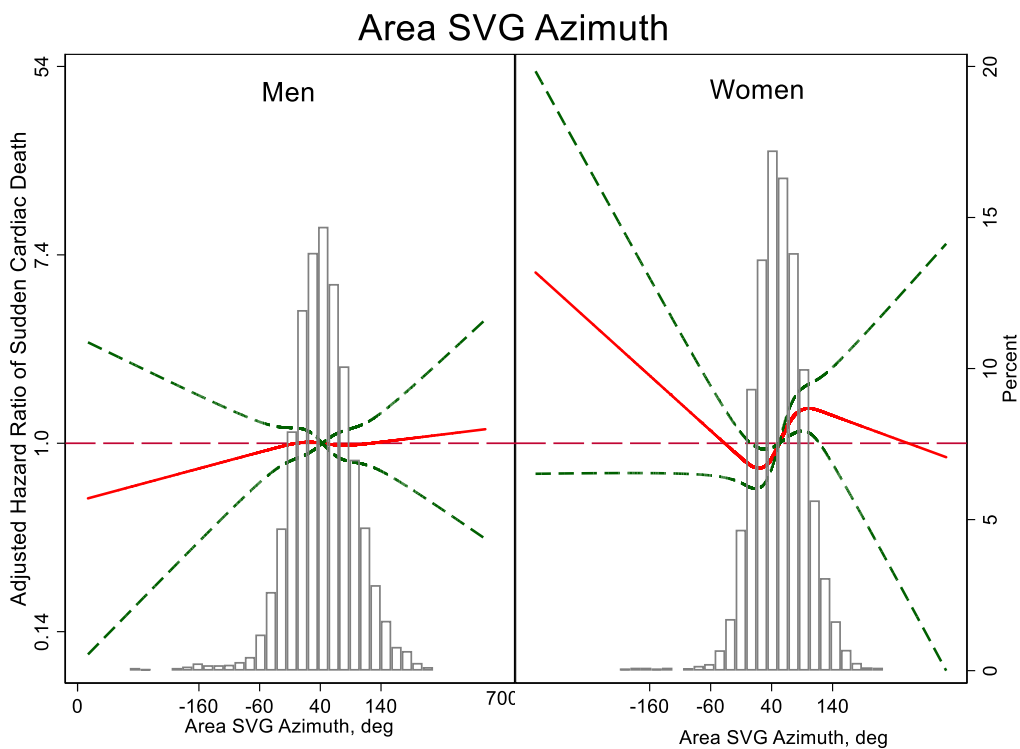

**Figure 2G: Adjusted risk of SCD associated with peak SVG magnitude**

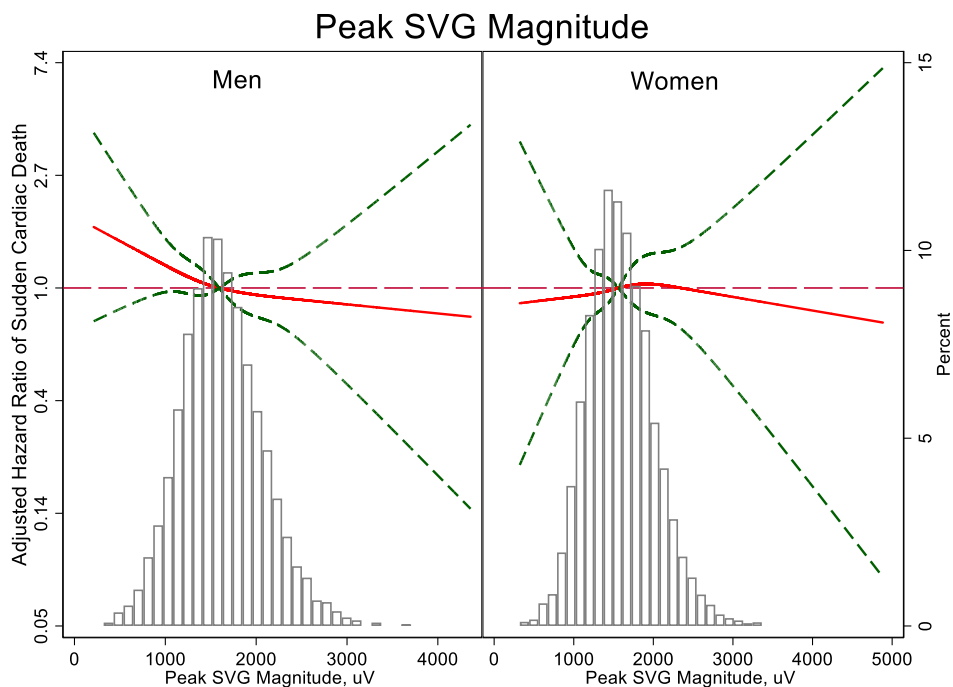

**Figure 2H: Adjusted risk of SCD associated with SVG magnitude**

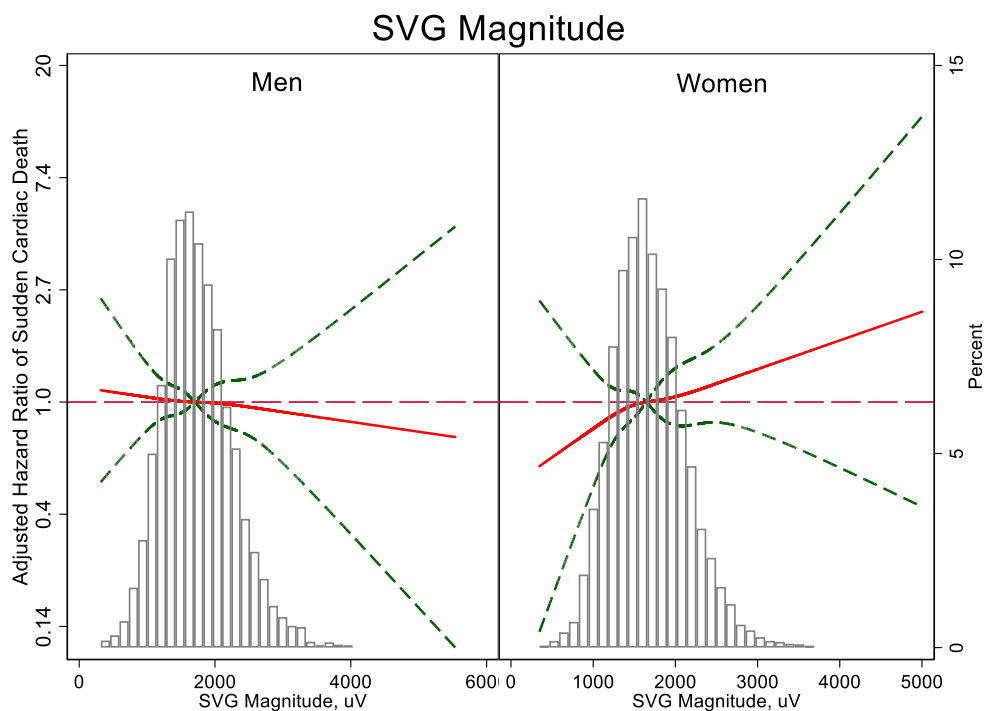

**Figure 2I: Adjusted risk of SCD associated with SAI QRST**

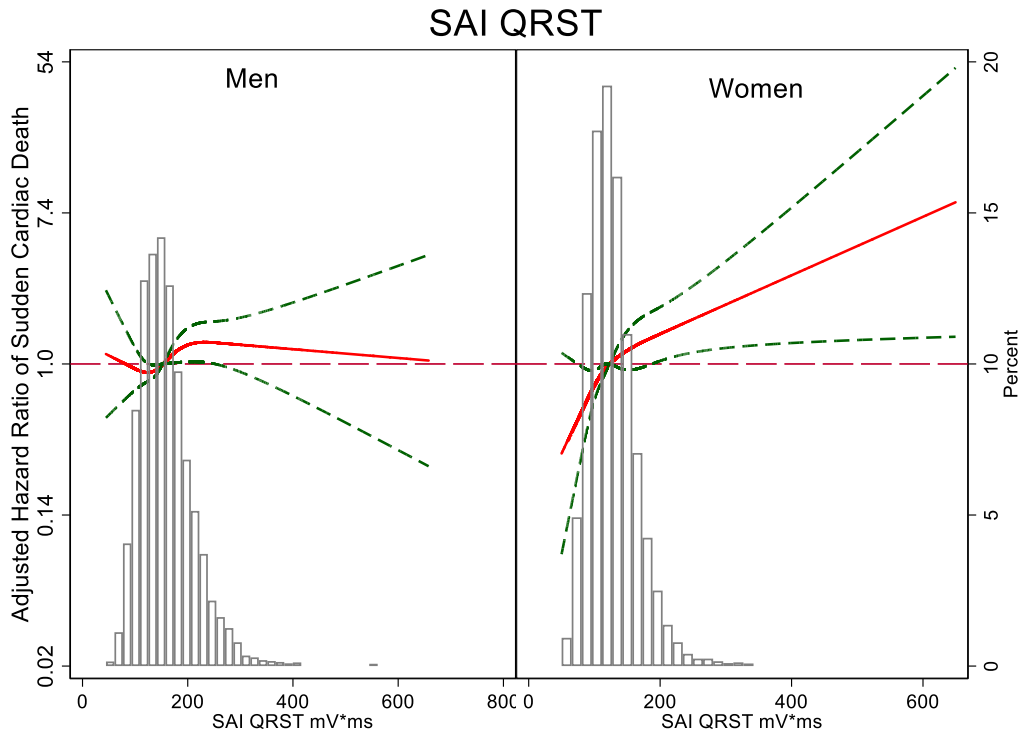

Source: http://biorxiv.org/content/10.1101/674689v2.full.pdf
